1           **Constructing An Adult Orofacial Premotor Atlas In Allen Mouse CCF**

2  
3   Jun Takatoh<sup>1,4\*</sup> & Jae Hong Park<sup>2,\*</sup>, Jinghao Lu<sup>1,\*</sup>, Shun Li<sup>1</sup>, P. M. Thompson<sup>2</sup>, Bao-Xia Han<sup>1</sup>,  
4   Shengli Zhao<sup>1</sup>, David Kleinfeld<sup>3</sup>, Beth Friedman<sup>3</sup>, Fan Wang<sup>1,2,4</sup> &

5  
6   1. Department of Neurobiology, Duke University, Durham, NC 27710

7   2. Department of Biomedical Engineering, Duke University, Durham, NC 27708

8   3. Department of Physics, University of California at San Diego, La Jolla, CA 92093

9   4. Department of Brain and Cognitive Sciences, Massachusetts Institute of Technology,  
10   Cambridge, MA 02139

11  
12   **\*, these authors contributed similarly**

13   **&, correspondence can be addressed to Jun Takatoh ([jtakatoh@mit.edu](mailto:jtakatoh@mit.edu)) or Fan Wang**  
14   **([fan\\_wang@mit.edu](mailto:fan_wang@mit.edu))**

## 15 **Abstract**

16 Premotor circuits in the brainstem control pools of orofacial motoneurons to execute essential  
17 functions such as drinking, eating, breathing, and in rodent, whisking. Previous transsynaptic  
18 tracing studies only mapped orofacial premotor circuits in neonatal mice but the adult circuits  
19 remain unknown due to technical difficulties. Here we developed a three-step monosynaptic  
20 transsynaptic tracing strategy to identify premotor neurons controlling whisker, tongue  
21 protrusion, and jaw-closing muscles in the adult. We registered these different groups of  
22 premotor neurons onto the Allen mouse brain common coordinate framework (CCF) and  
23 consequently generated a combined 3D orofacial premotor atlas, revealing unique spatial  
24 organizations of distinct premotor circuits. We also uncovered premotor neurons simultaneously  
25 innervating multiple motor nuclei and, thus, likely coordinating different muscles involved in the  
26 same orofacial behaviors. Our method for tracing adult premotor circuits and registering to Allen  
27 CCF is generally applicable and should facilitate the investigations of motor controls of diverse  
28 behaviors.

29

## 30 **Introduction**

31 Orofacial behaviors, such as breathing, drinking, and eating, are essential for many animals to  
32 access vital sustenance (oxygen, water, and food). For example, water can be consumed by a  
33 consecutive orofacial sequence, including jaw opening, licking and swallowing. Mice, as  
34 nocturnal animals, use whisking and sniffing, often in coordination with breathing, to explore  
35 their physical environment ([Deschenes et al., 2012](#); [Kleinfeld and Deschenes, 2011](#); [Moore et al.,](#)  
36 [2014](#)). Thus, many of the orofacial behaviors utilize multiple muscles through coordinated  
37 activity of their associated motoneurons in a seamless manner ([Kurnikova et al., 2017](#); [McElvain](#)  
38 [et al., 2018](#); [Moore et al., 2014](#)). Given that each orofacial motoneuron pool only projects to its  
39 corresponding muscle and lacks collaterals to innervate other central neurons, coordinated  
40 orofacial behaviors are thought to be achieved in part by orofacial premotor circuits in the  
41 brainstem. Thus, to understand how these brainstem circuits integrate information of external  
42 sensory stimuli, self-motions, and animals' needs or internal states to orchestrate the activities of  
43 multiple, distinct groups of cranial motoneurons, a key first step is to delineate the orofacial  
44 premotor circuit for each individual group of motoneurons in the adult nervous system. Putative  
45 premotor neurons projecting to different craniofacial motor nuclei had been previously mapped

46 using conventional retrograde tracers injected into different motor nuclei in the brainstem (Aldes,  
47 1990; Appenteng and Girdlestone, 1987; Borke et al., 1983; Chandler et al., 1990; Hattox et al.,  
48 2002; Isokawa-Akesson and Komisaruk, 1987; Li et al., 1996, 1997; Mizuno et al., 1983;  
49 Travers and Norgren, 1983; Vornov and Sutin, 1983). However, each orofacial motor nucleus  
50 contains functionally different and also antagonistic motor neurons (Aldes, 1995; Ashwell, 1982;  
51 Furutani et al., 2004; Gestreau et al., 2005; Hinrichsen and Watson, 1984; Klein and Rhoades,  
52 1985; Komiyama et al., 1984; Krammer et al., 1979; Limwongse and DeSantis, 1977; Mizuno et  
53 al., 1975; Terashima et al., 1993; Watson et al., 1982). For instance, the hypoglossal nucleus  
54 contains motoneurons for tongue protrusion, retrusion, and shaping. Injection of conventional  
55 retrograde tracer into the hypoglossal nucleus would, therefore, label premotor circuits for all  
56 these groups of muscles (Aldes, 1995; Gestreau et al., 2005; Krammer et al., 1979). Moreover,  
57 injection of conventional tracer could label neuronal populations projecting to non-motoneurons  
58 (e.g. interneurons) adjacent to the injection site. Thus, a major limitation of conventional tracers  
59 is the lack of muscle/motoneuron specificity.

60

61 To overcome such limitations, we and others used a monosynaptic retrograde rabies virus  
62 transsynaptic tracing strategy and examined the premotor circuits for various craniofacial and  
63 somatic motoneurons in neonatal mice (Sreenivasan et al., 2015; Stanek et al., 2014; Stepien et  
64 al., 2010; Takatoh et al., 2013; Tripodi et al., 2011). In this strategy, the specific muscle of  
65 interest is inoculated with a glycoprotein (G protein)-deleted RV ( $\Delta$ G-RV) encoding a  
66 fluorescent protein, and  $\Delta$ G-RV is taken up by motor axon terminals in the muscle and  
67 retrogradely transported to the motoneuron cell bodies.  $\Delta$ G-RV is trans-complemented with G  
68 protein in motor neurons and subsequently spread into premotor neurons. The lack of G protein  
69 in premotor neurons prevents further retrograde traveling of  $\Delta$ G-RV (Figure 1A). However,  $\Delta$ G-  
70 RV does not infect from peripheral muscles efficiently in animals older than P8, thus precluding  
71 the use of this strategy to trace premotor circuits beyond  $\sim$  P15. Since many orofacial behaviors  
72 do not fully develop until after weaning (Westneat and Hall, 1992), it is uncertain whether the  
73 orofacial premotor circuits revealed for neonatal mice are the same in adult animals, when most  
74 of the behavior and electrophysiology experiments are conducted.

75

76 Another previously unsolved issue is to map traced premotor neurons from different muscles to a  
77 standard reference frame to allow cross-comparison of their spatial distributions. Earlier studies  
78 mapped and annotated the location of traced cells roughly based on outlines of brain sections  
79 compared to the standard stereotaxic atlas ([Franklin and Paxinos, 2008](#)). It is difficult to compare  
80 the spatial organizations for different tracing results, let alone comparing results across  
81 laboratories because many anatomical structures in brainstem are poorly defined. For example,  
82 the intermediate reticular nucleus (IRt), where many orofacial premotor neurons reside, extends  
83 ~3 mm long in the adult along the anterior-posterior axis, thus simply annotating premotor  
84 neurons residing in IRt does not pinpoint the exact spatial location. Therefore, mapping premotor  
85 neurons in a standard coordinate frame and reconstructing them in the same 3-dimensional space  
86 with high spatial resolution would greatly facilitate subsequent functional interrogation of  
87 orofacial premotor circuits.

88

89 In the present study, we developed a new three-step monosynaptic rabies virus based strategy to  
90 trace orofacial premotor circuits in adult mice, and used this approach to delineate premotor  
91 circuits for whisker, genioglossus (tongue protrusion) and masseter (jaw-closing) motoneurons.  
92 The traced premotor neurons were all registered in the Allen Mouse Brain Common Coordinate  
93 Framework (CCFv3) ([Wang et al., 2020](#)). 3D reconstruction further enabled visualization of the  
94 full picture of their relative organization and distributions. The coordinates of all traced premotor  
95 neurons are accessible from the source file for interested users.

96

## 97 **Results**

### 98 **Adult premotor circuit tracing strategy**

99 To achieve monosynaptic orofacial premotor circuit tracing in adult mice, we developed a three-  
100 step monosynaptic rabies virus tracing strategy ([Figure 1B](#)). First, we introduce Cre recombinase  
101 into motoneurons innervating specific muscles through the intramuscular injection of the highly  
102 efficient retrograde viral vector AAV2retro-Cre ([Tervo et al., 2016](#)) in juvenile mice. Second, in  
103 adult mice, we inject Cre-dependent AAV expressing the TVA receptor and the optimized rabies  
104 glycoprotein oG (AAV-Flex-TVA-mCherry ([Miyamichi et al., 2013](#)) and AAV-Flex-oG ([Kim et  
105 al., 2016](#))) into the corresponding brainstem motor nuclei in adult mice. In this way, TVA-  
106 mCherry and oG are specifically expressed in motoneurons that innervate the muscle that



107 previously had AAV2retro-Cre injection. Finally, we inject the pseudotyped EnvA- $\Delta$ G-RV-GFP,  
108 which only infect TVA-expressing motoneurons. To further reduce any non-specific background  
109 infection by EnvA- $\Delta$ G-RV-GFP, we used a mutated version of the envelope, EnvA(M21), for  
110 pseudotyping - $\Delta$ G-RV. Thus EnvA(M21)-RV- $\Delta$ G-GFP was used for all our experiments  
111 ([Sakurai et al., 2016](#)). EnvA(M21)- $\Delta$ G-RV is also called CANE- $\Delta$ G-RV). Five days later,  
112 through the complementation of oG, the virus spread into the corresponding premotor neurons  
113 ([Wickersham et al., 2007](#)).

114  
115 Initially, to determine the efficiency and specificity of the AAV2retro-Cre virus transduction of  
116 intended motoneurons, we injected the Cre virus into the whisker pad at different ages and  
117 examined the expression of Cre-dependent tdTomato (using Ai 14 mice) in the facial motor  
118 nucleus, where the myotopic map is well-described ([Figure supplement 1](#)) ([Ashwell, 1982](#);  
119 [Deschenes et al., 2016b](#); [Furutani et al., 2004](#); [Hinrichsen and Watson, 1984](#); [Klein and Rhoades,](#)  
120 [1985](#); [Komiyama et al., 1984](#); [Sreenivasan et al., 2015](#); [Terashima et al., 1993](#); [Watson et al.,](#)  
121 [1982](#)). When we injected AAV2retro-Cre early in postnatal days (~P10) into the whisker pad, we  
122 observed widespread labeling: in addition to motoneurons located in the lateral part of the facial  
123 nucleus (FN) that innervate the whisker pad, neurons in the medial and middle parts of FN were  
124 also labeled, likely due to more systemic infections. As the age advanced, the retrogradely  
125 labeled neurons became progressively restricted to the lateral part of FN, and the number of  
126 labeled neurons also decreased drastically ([Figure supplement 1](#)). We, therefore, decided to  
127 inject AAV2retro-Cre in the desired craniofacial muscles at P17 as step 1 which gave us  
128 specificity and good efficiency of infection. For step 2, at more than 3 weeks later, helper viruses  
129 (AAV-Flex-TVA-mCherry and AAV-Flex-oG) would be injected into the corresponding motor  
130 nucleus, and for step 3, 2 weeks after helper AAVs injected, EnvA(M21)- $\Delta$ G-RV-GFP would be  
131 injected into the same nucleus ([Figure 1B](#)). The brains are collected 5 days after RV injection.

132  
133 We applied the three-step monosynaptic tracing strategy to investigate the premotor circuit for  
134 following motor units: whisker motoneurons (with cell bodies in lateral facial motor nucleus),  
135 tongue protruding genioglossus motoneurons of the hypoglossal nucleus, and the jaw-closing  
136 masseter motoneurons of the trigeminal motor nucleus, hereafter referred to as whisker,  
137 genioglossus, and masseter premotor circuits, respectively. The tracing results are described in

138 details below. Notably, despite efficient transsynaptic labeling, we often did not observe TVA-  
139 mCherry and GFP double-positive motoneurons (starter cells). This loss of starter cells was due  
140 to the toxicity of  $\Delta G$ -RV since omission of RV injection did not cause this problem (data not  
141 shown).

142

### 143 **Whisker premotor circuit**

144 The densest labeling of whisker premotor neuron was found in: the Bötzing complex  
145 (BötC)/retrofacial region ([Figure 2A](#)), the vibrissa zone of the IRt (vIRt) ([Figure 2B](#)), and the  
146 dorsal medullary reticular nucleus (MdD) ([Figure 2E](#)) (More quantitative analyses of the  
147 distribution of labeled cells in individual animals are described later in the paper).

148 BötC/retrofacial region resides immediately posterior to the FN is known to contain expiration-  
149 rhythmic cells ([Deschenes et al., 2016a](#)), and is implicated in controlling sniffing behavior that is  
150 often coupled with whisking during exploration ([Deschenes et al., 2012](#)). vIRt, located medial to  
151 the compact part of the nucleus ambiguus (cNA), is known to contain whisking oscillator cells.  
152 A few premotor neurons were also consistently observed in the preBötting complex (preBötC)  
153 ([Figure 2B](#)). We speculate that whisker premotor neurons in vIRt, BötC and preBötC are  
154 involved in modulating whisking rhythm.

155

156 We also found labeled neurons in the sensory-related areas, either within or adjacent to the  
157 ipsilateral spinal trigeminal nuclei, which receive inputs from whisker primary afferents. Those  
158 areas include the spinal trigeminal nucleus oralis (SpVO) ([Figure 2C](#)), rostral part of the  
159 interpolaris (SpVIR) ([Figure 2D](#)), and the muralis (SpVm, data not shown). Rostral to FN, we  
160 observed labeling in the ipsilateral Kölliker-Fuse (KF) ([Figure 2F](#)), the bilateral midbrain  
161 reticular formation (MRN, near the red nucleus) ([Figure 2G](#)), and the superior colliculus (SC)  
162 with contralateral dominance ([Figure 2H](#)). SC contains two clusters of whisker premotor neurons  
163 ([Figure supplement 2A and 2B](#)). The caudal cluster (Peak density; AP  $-3.73 \pm 0.16$  mm, ML  $1.34$   
164  $\pm 0.03$  mm, DV  $-2.57 \pm 0.09$  mm;  $n = 4$  animals) resides in the intermediate layer of SC, whereas  
165 the rostral cluster locates in the deep layer of SC (Peak density; AP  $-3.61 \pm 0.09$ mm, ML  $1.09 \pm$   
166  $0.04$ mm, DV  $-2.57 \pm 0.09$ ;  $n = 4$  animals).

167

168 Note that while we aimed our injection at the intrinsic whisker muscles controlling whisker  
169 protraction, we could not rule out the possibility of infecting a few extrinsic motoneurons  
170 regulating whisker-pad retraction. We did not want to lesion the nerve innervating the extrinsic  
171 pad muscle in order to make the tracing more specific for intrinsic muscle, because the mice  
172 need to survive into adult (8-9 weeks old) in order to trace adult premotor circuit and lesioning in  
173 juvenile mice could cause compensatory changes in the circuits. The distribution of whisker  
174 premotor neurons observed in adult mice is consistent with the pattern observed previously in  
175 peri-natal tracing experiments (Takato et al., 2013). However, we did find a few differences  
176 between adult and postnatal circuits. First, whisker premotor neurons were labeled in the  
177 ipsilateral deep cerebellar nucleus interpositus (Figure 2I) in the adult mice, which was not  
178 present in juvenile animals. Second, we did not find premotor neurons in the spinal vestibular  
179 nucleus in adult mice, which was observed in peri-natal tracing. Third, the clusters of premotor  
180 cells in the lateral paragigantocellular nucleus (LPGi) bilaterally in neonatal mice became less  
181 distinct in adult. The neurons in LPGi might have migrated medially in post-juvenile  
182 development because we observed the larger number of labeled cells in the gigantocellular  
183 reticular nucleus, which situates medial to LPGi, at the level of the facial motor nucleus in adult  
184 mice. Finally, we observed labeled neurons in the zona incerta and in extended amygdala in adult  
185 that were not labeled in the neonatal transsynaptic tracing studies (Figure supplement 2C and C')  
186 (Takato et al., 2013). Collectively, adult premotor tracing revealed both addition and loss of  
187 whisker premotor neurons in a few areas, and a similar spatial distribution patterns in the  
188 brainstem reticular and sensory nuclei in juvenile and adult mice.

189

### 190 **Tongue-protruding premotor circuit**

191 We did not distinguish between the ipsilateral and contralateral results in the tongue premotor  
192 tracing since the left and right hypoglossal motor nucleus are adjacent to the midline and the  
193 genioglossus muscles are also located near midline such that the AAV2retro virus could infect  
194 motoneurons on both sides. The greatest number of labeled tongue-protruding premotor neurons  
195 was found bilaterally in the dorsal IRt (Figure 3A and 3B) (More quantitative analyses of the  
196 distribution of labeled premotor neurons in individual animals are described later in the paper).  
197 These neurons spread along the anterior-posterior axis of the dorsal IRt with the highest density  
198 in the area anterior to the rostral edge of the hypoglossal nucleus (see the details of IRt

199 organization in the section below). Extending from the dorsal to ventral IRt (where vIRt resides),  
200 labeling gradually became sparser. Lateral and rostral to IRt, we also observed premotor neurons  
201 with relatively larger-sizes (compared to IRt) in the parvicellular reticular nucleus (PCRt) dorsal  
202 to the facial motor nucleus, and these cells exhibit medially oriented dendrites (Figure 3C). Many  
203 labeled cells with very large soma size were found in Gi/LPGi/LRt areas, spanning along the  
204 anterior-posterior axis (AP coordinate) (Figure 3D). In the pons, labeled premotor neurons were  
205 found in the supratrigeminal nucleus and peritrigeminal zone around the trigeminal motor  
206 nucleus (Figure 3E). In the sensory-related areas, labeled tongue premotor neurons were  
207 observed in the dorsal part of the principal trigeminal nucleus (PrV) (Figure 3C), nucleus solitary  
208 tract (NST), and dorsomedial SpV (DMSpV) (Figure 3F). In the cerebellum, labeled neurons  
209 resided in the medial subnucleus of DCN (Figure 3G). Additional premotor input was found in  
210 the raphe obscurus nucleus (Ro) (Figure 3H). The distribution of the adult genioglossus premotor  
211 neurons described above is similar to the pattern observed in juvenile mice (P8>P15  
212 transsynaptic tracing)(Stanek et al., 2014). However, in adult mice, the large cluster of premotor  
213 neurons in the dorsal midbrain reticular formation (dMRf) previously found in juvenile animals  
214 was absent.

215

### 216 **Jaw-closing premotor circuit**

217 In the masseter premotor circuit, extensive labeling was also found bilaterally along the anterior-  
218 posterior axis of the dorsal IRt (Figure 4A and 4B) (More quantitative analyses of the  
219 distribution of labeled masseter premotor cells in individual animals are described below).  
220 Interestingly, the majority of labeled dorsal IRt neurons were observed *contralaterally* in the  
221 caudal part of IRt (AP coordinate) (Figure 4C). Bilateral labeling in PCRt was observed as a  
222 lateral continuum of the dorsal IRt neurons at the level of the FN (Figure 4B). Rostrally, we  
223 found a distinct bilateral cluster of large-size neurons with medially directed dendrites situated  
224 around PCRt/PrV area immediately caudal to the trigeminal motor nucleus (Figure 4D). This  
225 group of neurons wedged into the dorsomedial and ventrolateral PrV. This area is identified by  
226 Nissl staining as containing a distinct cluster of neurons with large size than neighboring cells.  
227 Similar to the tongue-protruding circuit but with fewer numbers, cells of very large soma size  
228 were labeled ipsilaterally along the anterior-posterior axis spanning Gi/LPGi/LRt areas (AP  
229 coordinate) (Figure 4A). In the pons, numerous labeled masseter premotor neurons were also

230 observed in the supratrigeminal nucleus and peritrigeminal areas ([Figure 4D](#)). In the sensory-  
231 related areas, labeled cells resided bilaterally in the dorsal PrV ([Figure 4D](#)), ipsilaterally in the  
232 dorsomedial SpV ([Figure 4A](#)), and ipsilaterally in the mesencephalic trigeminal nucleus ([Figure](#)  
233 [4E](#)). In the cerebellum, we identified labeled neurons in the contralateral medial subnucleus of  
234 DCN ([Figure 4F](#)). The distribution of jaw-closing premotor neurons described above is similar to  
235 the pattern observed in juvenile mice (P8>P15 transsynaptic tracing) ([Stanek et al., 2014](#)).  
236 However, same as for the tongue premotor circuit, cells in dMRf observed in juvenile mice are  
237 absent in the adult circuit.

238

### 239 **Mapping orofacial premotor neurons onto Allen common coordinate framework (CCF)**

240 To generate standardized orofacial premotor atlas that enabling cross-comparison of different  
241 premotor circuits, RV-traced GFP-positive premotor neurons were mapped onto Allen Mouse  
242 Brain Common Coordinate Framework (CCFv3) ([Wang et al., 2020](#)). CCF is a widely used  
243 open-access 3D standardized brain atlas generated from the average of 1675 adult C57BL/6J  
244 mice. Registration of labeled neurons in CCF enables direct comparison of the results from  
245 different laboratories in the same coordinate space. Locations of RV-traced premotor neurons  
246 were translated into CCF coordinates using a method based on a previously described method  
247 with our modifications ([Shamash et al., 2018](#)). Briefly, each coronal section was registered to a  
248 corresponding CCF plane through diffeomorphic transformation (details see Methods).  
249 Subsequently, the labeled cells were identified and counted semi-automatically or manually, and  
250 their coordinates were transformed into CCF coordinates ([Figure 5A](#)). All traced orofacial motor  
251 neurons for whisker (n = 4 mice), genioglossus (n = 4 mice), and masseter (n = 4 mice) were  
252 registered to the CCF, and their coordinates are accessible from the source file. The cells in CCF  
253 coordinates were reconstructed in 2D and 3D spaces using Brainrender ([Claudi et al., 2020](#)).

254

### 255 **Cross-comparison of spatial distributions of whisker, tongue-protruding and jaw-closing** 256 **premotor circuits**

257 To compare the spatial organization of whisker, tongue-protruding, and jaw-closing premotor  
258 circuits, transsynaptic labeling results from individual animals were reconstructed in the same  
259 CCF space ([Figure 5B](#), [Supplemental Movie 1](#)). Reconstructed premotor circuits for each of the  
260 target muscle/motoneurons from different animals are shown in [Figure supplement 3-5](#). Using

261 the extracted spatial coordinates of all labeled neurons, we performed cross-correlation analysis  
262 of the spatial distribution patterns of tracing results from all samples (see Methods). Individual  
263 premotor tracing results from the same muscle/motor unit were highly correlated, whereas results  
264 obtained from different muscles/motor units showed low correlations in spatial patterns ([Figure](#)  
265 [5C](#), [Figure supplement 3-5](#)). When we plot the premotor neurons for  
266 whisker/genioglossus/masseter into the same CCF in 3D, the results revealed both overlapping  
267 and segregating features of these different premotor circuits ([Figure supplement 6](#), [Supplemental](#)  
268 [Movie 1](#)). The distribution density plot analysis of each premotor circuit also supports the  
269 muscle-specific differential spatial organizations as shown for all three planes: coronal, sagittal,  
270 and horizontal ([Figure 5D](#)). All three premotor circuits showed the highest density of labeling in  
271 the intermediate and parvicellular reticular formations (IRt and PCRt); however, the exact peak  
272 density positions were in the different locations of IRt/PCRt for different circuits. The whisker  
273 premotor circuit showed highest labeling density in the caudoventral areas of IRt ([Figure 5D](#),  
274 [Red](#)). The masseter premotor circuit had densest labeling in the anterodorsal area of IRt ([Figure](#)  
275 [5D](#), [Yellow](#)). The highest-density area of the genioglossus premotor neurons located in IRt in  
276 between the peaks for the whisker and masseter premotor cells (along the A-P axis), although  
277 there were shared regions between genioglossus and masseter premotor distributions ([Figure 5D](#),  
278 [Blue](#)). Finally, the extracted coordinates for each of the labeled cells enabled automatic  
279 assignment of their corresponding anatomical structure used by Allen CCF. Consequently, we  
280 can obtain the top 10 transsynaptically labeled premotor nuclei for each muscle recognized by  
281 the CCF ([Figure Supplement 7](#)). These analyses have collectively given us an overview of the  
282 differential anatomical organizations of whisker, tongue-protruding, and jaw-closing premotor  
283 circuits in adult mice.

284

### 285 **Detailed comparison of spatial Organization orofacial premotor circuits within IRt**

286 Our adult tracing results indicates IRt as the common area containing premotor neurons for all  
287 three circuits. Since earlier studies have either localized or implicated IRt as the region  
288 containing oscillator neurons for several orofacial actions (i.e. whisking, licking, chewing  
289 rhythm), yet IRt is a poorly defined area, we decided to examine the relative spatial  
290 organizations of different premotor circuits within IRt in greater details. We took advantage of  
291 our reconstructions of whisker, genioglossus, and masseter IRt premotor neurons in the same



292 CCF space to demarcate only cells within IRt (Figure 6, locations of craniofacial motor nuclei  
293 were also shown as landmarks). Again, these 3D reconstructions revealed partial overlapping and  
294 partial segregation of the three premotor circuits (Figure 6A–6C). Along the A-P axis, the  
295 highest density regions of ipsilateral jaw-closing and tongue-protruding premotor neurons in IRt  
296 were close to each other but with the peak of jaw premotor neurons shifted rostrally and ventrally  
297 (Figure 6G – 6O, jaw peak: AP  $-6.02 \pm 0.18$  mm, DV  $-6.45 \pm 0.04$  mm; n = 4 mice, tongue  
298 peak: AP  $-6.20 \pm 0.23$  mm, DV  $-5.74 \pm 0.29$ ; n = 4 mice). Along the D-V axis, while tongue  
299 premotor neurons are concentrated to more dorsal IRt than jaw premotor neurons, their  
300 distribution spread more to ventral IRt. Notably, the contralateral jaw IRt premotor neurons  
301 formed a discernable cluster caudal to the densest area of tongue IRt premotor neurons,  
302 displaying a bilaterally asymmetric distribution (Figure 6H). Whisker premotor neurons were  
303 more spatially separated from tongue and jaw premotor neurons in IRt, i.e at more caudal and  
304 ventral (AP  $-6.45 \pm 0.19$  mm, DV  $-6.45 \pm 0.04$  mm; n = 4 mice) locations in IRt (Figure 6D–6F).  
305 Furthermore, the tongue and jaw IRt premotor neurons showed similar densities between the  
306 ipsilateral and contralateral side (as licking and chewing generally involve muscles of both  
307 sides), the whisker IRt premotor neurons showed biased distribution to the ipsilateral side  
308 (Figure 6D and 6E). Collectively, these results suggest that functionally distinct groups of  
309 orofacial premotor neurons occupy the overlapping yet distinct spatial positions within IRt, and  
310 there is roughly a ventral-to-dorsal, and caudal-to-rostral gradient of whisker-tongue-jaw  
311 premotor neurons.

312

### 313 **Axon collaterals revealed common premotor neurons for distinct motor neurons**

314 As mentioned in introduction, orofacial behaviors often require coordinated activity of multiple  
315 groups of motoneurons. A premotor neuron that simultaneously innervates distinct motoneurons  
316 forms the simplest motor coordinating circuit. We therefore examined whether our premotor  
317 tracing results provide evidence for the existence of such common premotor neurons. Bright  
318 fluorescent signal from RV traced cells allows us to visualize their axons and collaterals.  
319 Interestingly, in genioglossus premotor tracing studies, axonal collaterals (from some labeled  
320 premotor neurons) were found in the middle part of the FN, VII<sub>middle</sub> (Figure 7B), where motor  
321 neurons controlling lip and jaw (platysma) movements reside, and were also found densely  
322 innervating the small subnucleus of the trigeminal motor nucleus, V<sub>AD</sub> (Figure 7C and 7C'),



323 which controls the jaw-opening anterior digastric muscles, as well as were observed in the  
324 accessory facial motor nucleus (data not shown), which innervates the posterior digastric jaw-  
325 opening muscle. These results suggest that certain premotor neurons controlling tongue  
326 protrusion also simultaneously control mouth- and jaw-opening through their axon collaterals,  
327 providing a neural substrate for coordinating multiple motor groups needed for proper execution  
328 of behaviors such as licking and feeding.

329  
330 Similarly, in masseter premotor tracing studies, the axonal collaterals of some labeled jaw-  
331 closing premotor neurons were observed in the middle part of the FN (Figure 7D) (VII<sub>middle</sub>,  
332 same region receiving innervations from the tongue premotor neurons), in the contralateral  
333 trigeminal motor nucleus (Figure 7E), and densely in the dorsal part of the hypoglossal nucleus  
334 (Figure 7F), where motor neurons for tongue-retrusion reside. In other words, the results suggest  
335 that premotor neurons controlling jaw-closing muscle also simultaneously modulate the tongue-  
336 retrusion and likely mouth closing muscles through their axon collaterals. In this manner,  
337 behaviorally synergistic motor units are coordinately activated to enable proper actions such as  
338 chewing without biting into the tongue. Finally, we also observed collaterals from whisker  
339 premotor neurons project to the contralateral later FN where whisker motoneurons reside (Figure  
340 7A) (but not to hypoglossal and trigeminal motor nuclei), likely coordinating bilateral whisking.

341 Where might the common premotor neurons that send collaterals to multiple brainstem motor  
342 nuclei reside? Dense axon collaterals projecting to V<sub>AD</sub> and VII<sub>middle</sub> motoneurons from  
343 genioglossus premotor neurons inspired us to trace common premotor neurons innervating both  
344 XII (where motoneurons for genioglossus reside) and VII<sub>middle</sub> using a retrograde split-Cre  
345 strategy. In this strategy, functionally inactive halves of Cre (CreN and CreC) packaged in  
346 retrograde lentivirus (RG-LV; RG-LV-CreN, RG-LV-CreC) were separately injected into  
347 VII<sub>middle</sub> and XII of Ai14 mice (Figure 7G) (Stanek et al., 2016; Wang et al., 2012). In this  
348 injection scheme, functional Cre is reconstituted, and tdTomato is visualized only in neurons  
349 simultaneously innervating VII<sub>middle</sub> and XII (Figure 7H). Retrograde split-Cre tracing revealed  
350 tdTomato-positive cells in SupV and the dorsal IRt areas (n = 4, Figure 7K and 7L), where  
351 genioglossus premotor neurons were found (Figure 3A, 3B, 3E and Figure supplement 4B).  
352 Notably, in addition to VII<sub>middle</sub> and XII, we found tdTomato-positive axon terminals onto

353 motoneurons in V<sub>AD</sub> (jaw opening) and in the nucleus ambiguus (mostly in semi-compact part),  
354 which are known to be involved in swallowing. Thus, VII<sub>middle</sub>-XII common premotor neurons  
355 located in SupV and dorsal IRt simultaneously innervate motoneurons controlling tongue  
356 protrusion, lower lip, jaw-opening, and throat (through the nucleus ambiguus) (Figure 7O and  
357 7P), suggesting that those common premotor neurons likely represent a fundamental neural  
358 substrate for coactivating these muscles. Interestingly, SupV and dorsal IRt were also labeled by  
359 the retrograde split-Cre tracing from the left and right sides of VII<sub>middle</sub> (Figure supplement 8).  
360 Those neurons also project additional collaterals to V and XII, in addition to VII<sub>middle</sub>. These  
361 results indicate that SupV and dorsal IRt regions may be critical brainstem hubs containing  
362 common premotor neurons that coordinate multiple groups of motoneurons for orofacial feeding  
363 behaviors (Figure 7P).

364

## 365 **Discussion**

366 We developed a three-step monosynaptic RV tracing to trace the premotor circuits for three  
367 different orofacial muscles in adult mice (Figure 8). We registered and reconstructed all the  
368 traced neurons in the standardized Allen mouse CCF and consequently generated the atlas  
369 showing positions of different orofacial premotor circuits in a common brain. This common atlas  
370 uncovers the overlapping yet distinct spatial organizations of premotor neurons involved in  
371 controlling movements of whiskers, the tongue and the jaw. Visualization of premotor neurons'  
372 axon collaterals and retrograde split-Cre tracing studies further highlighted premotor neurons in  
373 SupV and dorsal IRt as potential substrates for coordinating multiple distinct orofacial muscles  
374 involved in feeding-related behaviors. Since these three groups of motoneurons are involved in  
375 three rhythmic orofacial behaviors, whisking, licking, or chewing, we next focus our discussion  
376 on the implications of the premotor atlas for rhythm generations.

377

## 378 **Implications for premotor neurons modulating whisking rhythm**

379 Among the three orofacial premotor circuits in adult mice that we have mapped, the whisker  
380 premotor atlas consists of the most numerous brain structures (Figure 8). This is not surprising  
381 since dynamic whisker movements, as opposed to more stereotyped licking and chewing, are  
382 needed for tactile exploration of complex physical environment. Two previous studies uncovered

383 vIRt as the region containing whisker oscillator neurons (Deschenes et al., 2016b; Moore et al.,  
384 2013). Indeed, we found extensive labeling of whisker premotor neurons in vIRt (with  
385 qualitatively more labeled neurons than neonatal tracing). Previous studies also revealed the  
386 coupling between breathing/sniffing and whisking (Moore et al., 2013; Welker, 1964). Along  
387 this line, we traced premotor cells in two brainstem areas known to control the respiratory  
388 rhythm, the retrofacial/BötC and preBötC (in both juvenile and adult mice), suggesting their  
389 roles in coordinating breathing and whisking, and potentially resetting whisking rhythm  
390 (Kleinfeld et al., 2014). However, there is an unresolved issue with regard to the inputs from the  
391 inspiratory rhythm generator preBötC. Moore et al showed that preBötC innervate vIRt,  
392 therefore preBötC is likely pre-premotor for whisker motoneurons (Moore et al., 2013).  
393 Deschênes et al. further demonstrated that in rats, a small injection of sindbis-GFP virus in  
394 electrophysiologically identified the lateral portion of preBötC revealed that these labeled  
395 preBötC neurons projects specifically to the lateral and dorsolateral part of FN where motor  
396 neurons for the nares dilation and extrinsic whisker-pad retraction reside, but rarely to the part  
397 where intrinsic whisker motoneurons locate (Deschenes et al., 2016b). In contrast, Yang and  
398 Feldman have shown that in mice, somatostatin- and glycine-positive preBötC neurons both  
399 project to the entire lateral part of FN, including ventral lateral FN where whisker-protracting  
400 intrinsic motoneurons reside (Yang and Feldman, 2018). In our tracing strategy, we injected  
401 AAV2retro-Cre into the whisker pad in P17 mice, therefore it is possible that we traced premotor  
402 neurons both for intrinsic and extrinsic motoneurons. Further study will be required to  
403 understand the precise connection between retrofacial/BötC and preBötC premotor neurons and  
404 extrinsic versus intrinsic motoneurons for whisking.

405

#### 406 **Implications for premotor neurons modulating licking rhythm**

407 In the tongue-protruding premotor circuit, dorsal IRt near the rostral end of the hypoglossal  
408 nucleus contains the highest density of premotor neurons. This area has previously been  
409 implicated as the rhythm generator for licking. Using extracellular recording in awake rats,  
410 Travers et al. demonstrated that neurons in this area show rhythmic activity phase-locked to  
411 licking (Travers et al., 2000). Furthermore, premotor neurons in this area express cFos after  
412 gaping behavior involving extensive tongue movement (DiNardo and Travers, 1997). However,  
413 bilateral infusion of muscimol in this area reduces licking EMG amplitude with minimal effect

414 on the licking frequency (Chen et al., 2001; Travers et al., 2010), raising the possibility that  
415 dorsal IRt cells are the output of the actual licking oscillator. Importantly, bilateral infusion of  
416 muscimol in the same IRt area also suppresses chewing/mastication (see below), indicating the  
417 function of the dorsal IRt for coordination of tongue and jaw during ingestion behaviors. We also  
418 traced premotor neurons in NTS and the adjacent dorsolateral IRt. Interestingly, bilateral  
419 infusion of  $\mu$ -opioid receptor agonist, Damgo, in the dorsolateral IRt/rostral NTS reduces licking  
420 frequency with increased amplitude. Future works using premotor neuron-specific manipulations  
421 will be necessary to dissect the function of the dorsal IRt and rostral NTS for modulating licking  
422 and chewing rhythms and amplitudes.

423

#### 424 **Implications for premotor neurons modulating chewing rhythm**

425 In the jaw-closing premotor circuit, two regions, the dorsal IRt and PCRt between the rostral  
426 extent of the FN and the rostral extent of the hypoglossal nucleus contain the highest numbers of  
427 premotor cells. This IRt/PCRt area has been implicated as a critical node for generating chewing  
428 rhythm (Chandler et al., 1990; Nakamura et al., 2017; Nozaki et al., 1986a, b; Travers et al.,  
429 2010). Nozaki et al., used a fictive rhythmic chewing preparation in guinea pigs to show that  
430 stimulation of the cortical masticatory area induces rhythmic activity in what was at the time  
431 called the oral part of the gigantocellular (Gi) reticular nucleus (Go). The rhythmic activity is, in  
432 turn, conveyed to the trigeminal motor nucleus through premotor neurons in the PCRt (Nozaki et  
433 al., 1986a, b). More recently, Travers et al., demonstrated in awake rats that muscimol infusion  
434 in rostral IRt/PCRt but not Go suppresses neuropeptide Y induced chewing behavior (Travers et  
435 al., 2010). Nakamura et al., used awake mice to show that infusion of bicuculline in the same  
436 IRt/PCRt area evokes chewing (Nakamura et al., 2017). Future studies with causal manipulation  
437 fo IRt/PCRt jaw premotor neurons should provide more definitive answers as to which neurons  
438 in IRt/PCRt and how are they involved in generating masticatory rhythms. Since there are also  
439 tongue-premotor neurons labeled in this area, it will be interesting to know whether these cells  
440 also innervate tongue-muscles and coordinating jaw-tongue movements during breaking down of  
441 food.

442 Other studies showed that neurons in the dorsal PrV generate rhythmic bursting in  
443 brainstem slices spontaneously and upon electrical stimulation of the trigeminal tract (Morquette  
444 et al., 2015; Sandler et al., 1998), and during fictive chewing in anaesthetized and paralyzed

445 rabbits (Tsuboi et al., 2003), suggesting the role of this area for chewing rhythm generation. We  
446 also observed jaw premotor neurons in the lateral edge of PCRt (which could be part of SpVO or  
447 PrV) with an A-P location at the caudal edge of the trigeminal motor nucleus. Several studies  
448 assigned this area as a part of SpVO based on its receptive field in the oral areas (Inoue et al.,  
449 1992; Westberg et al., 1995; Yoshida et al., 1994). Neurons in this area in cats respond to either  
450 noxious stimulation of the tongue or to light mechanical stimulation of intra- or perioral  
451 structures, including the teeth, gingiva, and lip. These neurons issue collaterals that terminate in  
452 the trigeminal motor nucleus (Yoshida et al., 1994). Inoue et al., demonstrated in rats that  
453 premotor neurons in SpVO and the supratrigeminal nucleus share the same masticatory rhythm  
454 during cortically induced fictive mastication (Inoue et al., 1992). Some of these neurons are  
455 activated at short latencies by the stimulation of cortical masticatory area, or stimulation of the  
456 inferior alveolar and infraorbital nerves innervating oral areas, or passive jaw-opening. Based on  
457 these properties, it is suggested that premotor neurons in SpVO integrate sensory information  
458 from the oral area and rhythmic activity generated by a central rhythm generator to produce  
459 appropriate activity patterns during mastication.

460

#### 461 **Common premotor neurons as potential neuronal substrate for coordinating orofacial** 462 **behaviors**

463 Tracing of axon collaterals from  $\Delta$ G-RV-GFP labeled orofacial premotor neurons and the  
464 retrograde split-Cre mediated tracing studies uncovered common premotor neurons with  
465 extensive axon collateral network to jaw (trigeminal motor), tongue (hypoglossus), lip-jaw  
466 (facial) and throat (nucleus ambiguus), but importantly not to whiskers. The retrograde split-Cre  
467 tracing revealed that the major sources of these common premotor neurons are SupV and the  
468 dorsal IRt. Notably, these areas also contain bilaterally projecting masseter premotor neurons  
469 (Stanek). Neurons in both dorsal IRt and SupV are known to show rhythmic firing during licking  
470 (see Discussion above) and chewing (Inoue 1992). Common premotor neurons in SupV and  
471 dorsal IRt, therefore, may serve the simplest form of neuronal substrate for coordinating feeding-  
472 related orofacial behaviors by mean of broadcasting rhythmic information of licking and  
473 chewing to synergistic muscles. Future functional manipulation studies are needed to determine  
474 their causal functions in coordination of different orofacial behaviors.

475

## 476 **Other notable implications of the adult orofacial atlas**

477 The three-step monosynaptic RV tracing allows us to reveal adult premotor circuits for a specific  
478 group of motor neurons, thereby advancing the transsynaptic premotor maps previously only  
479 available for neonatal mice. The coordinates of all traced neurons registered to the Allen mouse  
480 CCF are accessible from the source file, and can be used in the future to guide placement of  
481 electrodes for in vivo recordings as mice perform different orofacial behaviors. Comparing to  
482 neonatal circuits, we observed new additions of presynaptic inputs to control whisker  
483 motoneurons from ZI, DCN, and extended amygdala, and loss of presynaptic inputs from dMRF  
484 to tongue and jaw motoneurons in the adult premotor circuits (Figure 8). These changes may  
485 reflect more fine-tuned control of tactile whiskers, and changes in feeding behaviors from  
486 neonatal suckling to adult licking and chewing. Future studies with multi-color RV tracing using  
487 additional sets of recombinase and receptor-virus envelope, such as AAV2retro-FlpO, TVB-  
488 EnvB (Matsuyama et al., 2015) will enable simultaneous tracing of premotor circuits from two  
489 different motoneuron groups involved in the same orofacial actions. We envision transsynaptic  
490 premotor circuit tracing combined with functional characterization and activity manipulations  
491 will greatly advance our understanding of orofacial motor control.

492

## 493 **Materials and methods**

### 494 **Animals**

495 All animal experiments were conducted according to protocols approved by The Duke  
496 University Institutional Animal Care and Use Committee.  
497 Male and female C57B/L6 and Gt(Rosa)26Sor<sup>tm14(CAG-tdTomato)Hze/J</sup> (Ai14) (JAX # 007914) mice  
498 were obtained from the Jackson Laboratory (Bar Harbor, ME, USA) and used for virus tracing  
499 experiments.

500

### 501 **Viruses**

502 AAV2retro-CAG-Cre

503 AAV2/8-CAG-Flex-TVA-mCherry (#48332, addgene Cambridge, MA, USA) (Miyamichi et al.,  
504 2013)

505 AAV2/8-CAG-Flex-oG (#74292, addgene) (Kim et al., 2016)



506 EnvA(M21)-RV-ΔG-GFP (also called CANE-ΔG-RV) (Sakurai et al., 2016; Wickersham et al.,  
507 2007)

508

### 509 **Monosynaptic transsynaptic rabies virus tracing**

510 The tracing was performed in three steps.

#### 511 **Peripheral tissue injection**

512 To label a specific group of orofacial motor neurons, AAV2-retro-CAG-Cre (1000 μl, Harvard  
513 University, Boston Children's Hospital Viral Core) was injected into either the whisker pad,  
514 genioglossus or masseter muscles at postnatal day 17, using a volumetric injection system (based  
515 on a single-axis oil hydraulic micromanipulator MO-10, Narishige International USA, Inc., East  
516 Meadow, NY, USA) (Petreanu et al., 2009) equipped with a pulled and beveled glass pipette  
517 (Drummond, 5-000-2005). Before injection, mice were anesthetized by a cocktail of ketamine  
518 and xylazine (100 mg/kg and 10 mg/kg, i.p.). For the whisker pad, the virus was injected  
519 subcutaneously into the areas around C2 and B2 whiskers (500 nl each). For the genioglossus,  
520 the virus was injected directly into the muscle after exposing it by ventral neck dissection.  
521 Briefly, the genioglossus muscle was exposed by making a small incision in the mylohyoid  
522 muscle after the anterior digastric muscle was split open in the midline. For the masseter, the  
523 virus was injected into the area between the buccal and marginal nerves after making a small  
524 incision on a skin.

525

#### 526 **Helper virus injection**

527 For specific infection and glycoprotein complementation of pseudotyped RV-ΔG, helper viruses  
528 (120 nl, 1:1 mixture of AAV2/8-CAG-Flex-TVA-mCherry and AAV2/8-CAG-Flex-oG) were  
529 stereotaxically injected into the lateral part of the facial motor, hypoglossus, or trigeminal motor  
530 nuclei using a stereotaxic instrument (Model 963, David Kopf Instruments, Tujunga, CA, USA)  
531 three weeks or longer after the peripheral tissue injection. The viruses were injected at the rate of  
532 30 nl/min with the injection system described above. The stereotaxic coordinates used were for  
533 the lateral part of the facial motor nucleus: 5.8 mm posterior, 1.38 mm lateral to the bregma, and  
534 5.2 mm below the brain surface; for the hypoglossus nucleus: 5.8 mm posterior, 0.05 mm lateral  
535 to the bregma, and 5.15 mm below the brain surface with an anteroposterior 20° angle from  
536 vertical; and for the trigeminal motor nucleus: 4.1 mm posterior, 1.27 mm lateral to the bregma,



537 and 4.6 mm below the brain surface with an anteroposterior 20° angle from vertical. Before  
538 suturing the skin, the craniotomy was filled with kwik-sil (World Precision Instruments, Inc.,  
539 Sarasota, FL, USA) and covered with cyanoacrylate glue (Super Glue, Loctite, Westlake, Ohio,  
540 USA).

541

### 542 **Pseudotyped RV injection**

543 Two weeks after the helper virus injection, EnvA(M21)-RV-ΔG-GFP (250 nl) was  
544 stereotaxically injected into the lateral part of the facial motor, hypoglossus, or trigeminal motor  
545 nuclei as described above.

546

### 547 **Retrograde split-Cre tracing**

548 To label premotor neurons innervating multiple distinct motor nuclei, retrograde lentivirus  
549 carrying CreC or CreN (RG-LV-CreN and RG-LV-CreC) was stereotaxically injected separately  
550 into target motor nuclei of Cre-dependent tdTomato reporter mice. Specifically, for VII<sub>middle</sub>-XII  
551 premotor neurons, RG-LV-CreN (750nl) and RG-LV-CreC (500nl) were injected into VII<sub>middle</sub>  
552 (5.8 mm posterior, 1.3 mm lateral to the bregma, and 5.2 mm below the brain surface) and the  
553 hypoglossus nucleus, respectively. For, bilateral VII<sub>middle</sub> premotor neurons, RG-LV-CreN  
554 (750nl) and RG-LV-CreC (500nl) were injected into left and right VII<sub>middle</sub>, respectively.

555

### 556 **Histology**

557 Five days after the pseudotyped RV injection, the animals were deeply anesthetized with  
558 isoflurane and transcardially perfused with 10% sucrose in Milli-Q water, followed by ice-cold  
559 4% paraformaldehyde in 0.1 M phosphate buffer, pH 7.4. After dissection, the brains were post-  
560 fixed in the same fixative for overnight at 4°C and freeze-protected in 30% sucrose in phosphate  
561 buffer saline (PBS) at 4°C until they sank. The brains were embedded in OCT compound  
562 (Sakura Finetek USA, Inc., Torrance, CA, USA) and frozen in dry-ice-cooled ethanol. Eighty  
563 μm free-floating coronal sections were made using a cryostat (Leica Biosystems Inc, Buffalo  
564 Grove, IL, USA). The sections were briefly washed in PBS and stained with Neurotrace blue  
565 fluorescent Nissl stain (1:500, Thermo Fisher Scientific, Waltham, MA, USA) in 0.3% Triton-  
566 X100/PBS for overnight at 4°C. The sections were briefly washed and mounted on slide glasses  
567 with Mowiol.

568 For retrograde split-Cre tracing experiments, some sections were stained with rabbit anti-RFP  
569 (1:500, #600-401-379, Rockland Immunochemicals, Inc. Limerick, PA, USA) and goat anti-  
570 choline Acetyltransferase (1:500, #AB144P, MilliporeSigma, Burlington, MA, USA) antibodies.  
571 Primary antibodies were visualized using donkey anti-rabbit antibody conjugated with Alexa  
572 Fluor Plus 555 (1:1000, #A32794, Thermo Fisher Scientific) and donkey anti-goat antibody  
573 conjugated with Alexa Fluor Plus 488 (1:1000, #A32814, Thermo Fisher Scientific).

574

## 575 **Imaging**

576 Fluorescent images for atlas registration were taken with a Zeiss 700 laser scanning confocal  
577 microscope (Carl Zeiss Inc., Thornwood, NY, USA) using a 10x objective (pixel size,  $1.042 \times$   
578  $1.042 \mu\text{m}$ ).

579

## 580 **Mapping of Labeled neurons in Allen common coordinate framework**

581 A previously published method SHARP-track ([Shamash et al., 2018](#)) was modified to improve  
582 registration of the brainstem sections to Allen CCF. Briefly, three steps for the registration were  
583 either introduced or improved, including (i) user-assist nonrigid deformation registration, (ii)  
584 correct conversion of coordinates (ML and DV to Bregma) after diffeomorphic registering of a  
585 section to the Allen CCF along the AP axis, and (iii) an option for automatic cell identification.  
586 First, the affine transform used by SHARP-track for brain section to reference registration is  
587 upgraded to LogDemons methods ([Lu et al., 2018](#)), a fast diffeomorphic registration method that  
588 can handle a more diverse scenarios of section distortion. Second, the procedures to determine  
589 the coordinates of the brain sections after nonrigid transformation and registration were  
590 corrected, and this is also critical for 3D reconstruction and visualizations of the results from  
591 serial 2D sections. Third, in addition to the manual cell identification by user generated click, an  
592 optional automatic cell identification function was developed to recover most identifiable cells,  
593 and subsequently users can manually correct mistakes. The automatic cell identification method  
594 contains a series of simple filters which balanced the speed and the precision of the  
595 approximation. Detailed implementation can be found in the Github repository  
596 ([https://github.com/wanglab-neuro/Allen\\_CCF\\_reg](https://github.com/wanglab-neuro/Allen_CCF_reg)). This site will be freely available upon  
597 publication. Coordinates of Bregma in Allen CCF was set at AP, 5400; ML, 5700; DV 0  
598 ([Shamash et al., 2018](#)).

599

### 600 **Spatial correlation analysis**

601 All 3D coordinates of the identified cells per mouse were concatenated. The spatial distribution  
602 was then estimated using multivariate kernel smoothing density function estimation. The  
603 estimated multivariate (3D) density functions for each mouse were then vectorized and pairwise  
604 cosine similarity was computed for all the mice. The result was shaped to a square matrix which  
605 was shown in the figure.

606

### 607 **Visualization of labeled neurons on Allen common coordinate framework**

608 Premotor neurons registered in Allen CCF were visualized using Brainrender ([Claudi et al.,](#)  
609 [2020](#)) or a custom written code (for density plots). Briefly, the coordinates are converted into  
610 Allen CCF coordinates by multiplying 1000 and adding 5400 (for AP) and 5700 (for ML).  
611 Converted cell coordinates were plotted using Points function in Brainrender v2.0.0.0 by  
612 following the instruction (<https://github.com/brainlobe/brainrender>). Density plots are generated  
613 by using kdeplot function in seaborn (<https://seaborn.pydata.org>).

614

### 615 **Acknowledgment**

616 We thank Lauren McElvain and Harvey J. Karten for discussion on anatomical annotation. We  
617 thank Wang lab for helpful discussions and suggestions over the course of this work. This work  
618 is support by NIH grants U19 NS107466, and NS 077986.

619 **References**

620

621 Aldes, L.D. (1990). Topographically organized projections from the nucleus subceruleus to the  
622 hypoglossal nucleus in the rat: a light and electron microscopic study with complementary  
623 axonal transport techniques. *J Comp Neurol* 302, 643-656,  
624 doi: 10.1002/cne.903020318.

625

626 Aldes, L.D. (1995). Subcompartmental organization of the ventral (protrusor) compartment in  
627 the hypoglossal nucleus of the rat. *J Comp Neurol* 353, 89-108,  
628 doi: 10.1002/cne.903530109.

629

630 Appenteng, K., and Girdlestone, D. (1987). Transneuronal transport of wheat germ agglutinin-  
631 conjugated horseradish peroxidase into trigeminal interneurons of the rat. *J Comp Neurol* 258,  
632 387-396,  
633 doi: 10.1002/cne.902580307.

634

635 Ashwell, K.W. (1982). The adult mouse facial nerve nucleus: morphology and musculotopic  
636 organization. *J Anat* 135, 531-538,

637

638

639 Borke, R.C., Nau, M.E., and Ringler, R.L., Jr. (1983). Brain stem afferents of hypoglossal  
640 neurons in the rat. *Brain Res* 269, 47-55,  
641 doi: 10.1016/0006-8993(83)90961-7.

642

643 Chandler, S.H., Turman, J., Jr., Salem, L., and Goldberg, L.J. (1990). The effects of nanoliter  
644 ejections of lidocaine into the pontomedullary reticular formation on cortically induced  
645 rhythmical jaw movements in the guinea pig. *Brain Res* 526, 54-64,  
646 doi: 10.1016/0006-8993(90)90249-b.

647

648 Chen, Z., Travers, S.P., and Travers, J.B. (2001). Muscimol infusions in the brain stem reticular  
649 formation reversibly block ingestion in the awake rat. *Am J Physiol Regul Integr Comp Physiol*  
650 280, R1085-1094,  
651 doi: 10.1152/ajpregu.2001.280.4.R1085.

652

653 Claudi, F., Tyson, A.L., and Branco, T. (2020). Brainrender. A python based software for  
654 visualisation of neuroanatomical and morphological data. *BioRxiv*,  
655 doi: <https://doi.org/10.1101/2020.02.23.961748>.

656

657 Deschenes, M., Kurnikova, A., Elbaz, M., and Kleinfeld, D. (2016a). Circuits in the Ventral  
658 Medulla That Phase-Lock Motoneurons for Coordinated Sniffing and Whisking. *Neural Plast*  
659 2016, 7493048,  
660 doi: 10.1155/2016/7493048.

661

662 Deschenes, M., Moore, J., and Kleinfeld, D. (2012). Sniffing and whisking in rodents. *Curr Opin*  
663 *Neurobiol* 22, 243-250,

- 664 doi: 10.1016/j.conb.2011.11.013.  
665
- 666 Deschenes, M., Takatoh, J., Kurnikova, A., Moore, J.D., Demers, M., Elbaz, M., Furuta, T.,  
667 Wang, F., and Kleinfeld, D. (2016b). Inhibition, Not Excitation, Drives Rhythmic Whisking.  
668 *Neuron* 90, 374-387,  
669 doi: 10.1016/j.neuron.2016.03.007.  
670
- 671 DiNardo, L.A., and Travers, J.B. (1997). Distribution of fos-like immunoreactivity in the  
672 medullary reticular formation of the rat after gustatory elicited ingestion and rejection behaviors.  
673 *J Neurosci* 17, 3826-3839,  
674 doi: 10.1523/JNEUROSCI.17-10-03826.1997.  
675
- 676 Franklin, K.B.J., and Paxinos, G. (2008). The mouse brain in stereotaxic coordinates  
677 (Amsterdam: Elsevier/Academic Press),  
678 .  
679
- 680 Furutani, R., Izawa, T., and Sugita, S. (2004). Distribution of facial motoneurons innervating the  
681 common facial muscles of the rabbit and rat. *Okajimas Folia Anat Jpn* 81, 101-108,  
682 doi: 10.2535/ofaj.81.101.  
683
- 684 Gestreau, C., Dutschmann, M., Obled, S., and Bianchi, A.L. (2005). Activation of XII  
685 motoneurons and premotor neurons during various oropharyngeal behaviors. *Respir Physiol*  
686 *Neurobiol* 147, 159-176,  
687 doi: 10.1016/j.resp.2005.03.015.  
688
- 689 Hattox, A.M., Priest, C.A., and Keller, A. (2002). Functional circuitry involved in the regulation  
690 of whisker movements. *J Comp Neurol* 442, 266-276,  
691 doi: 10.1002/cne.10089.  
692
- 693 Hinrichsen, C.F., and Watson, C.D. (1984). The facial nucleus of the rat: representation of facial  
694 muscles revealed by retrograde transport of horseradish peroxidase. *Anat Rec* 209, 407-415,  
695 doi: 10.1002/ar.1092090321.  
696
- 697 Inoue, T., Masuda, Y., Nagashima, T., Yoshikawa, K., and Morimoto, T. (1992). Properties of  
698 rhythmically active reticular neurons around the trigeminal motor nucleus during fictive  
699 mastication in the rat. *Neurosci Res* 14, 275-294,  
700 doi: 10.1016/0168-0102(92)90072-k.  
701
- 702 Isokawa-Akesson, M., and Komisaruk, B.R. (1987). Difference in projections to the lateral and  
703 medial facial nucleus: anatomically separate pathways for rhythmical vibrissa movement in rats.  
704 *Exp Brain Res* 65, 385-398,  
705 doi: 10.1007/BF00236312.  
706
- 707 Kim, E.J., Jacobs, M.W., Ito-Cole, T., and Callaway, E.M. (2016). Improved Monosynaptic  
708 Neural Circuit Tracing Using Engineered Rabies Virus Glycoproteins. *Cell Rep* 15, 692-699,  
709 doi: 10.1016/j.celrep.2016.03.067.

710  
711 Klein, B.G., and Rhoades, R.W. (1985). Representation of whisker follicle intrinsic musculature  
712 in the facial motor nucleus of the rat. *J Comp Neurol* 232, 55-69,  
713 doi: 10.1002/cne.902320106.  
714  
715 Kleinfeld, D., and Deschenes, M. (2011). Neuronal basis for object location in the vibrissa  
716 scanning sensorimotor system. *Neuron* 72, 455-468,  
717 doi: 10.1016/j.neuron.2011.10.009.  
718  
719 Kleinfeld, D., Deschenes, M., Wang, F., and Moore, J.D. (2014). More than a rhythm of life:  
720 breathing as a binder of orofacial sensation. *Nat Neurosci* 17, 647-651,  
721 doi: 10.1038/nn.3693.  
722  
723 Komiyama, M., Shibata, H., and Suzuki, T. (1984). Somatotopic representation of facial muscles  
724 within the facial nucleus of the mouse. A study using the retrograde horseradish peroxidase and  
725 cell degeneration techniques. *Brain Behav Evol* 24, 144-151,  
726 doi: 10.1159/000121312.  
727  
728 Krammer, E.B., Rath, T., and Lischka, M.F. (1979). Somatotopic organization of the hypoglossal  
729 nucleus: a HRP study in the rat. *Brain Res* 170, 533-537,  
730 doi: 10.1016/0006-8993(79)90970-3.  
731  
732 Kurnikova, A., Moore, J.D., Liao, S.M., Deschenes, M., and Kleinfeld, D. (2017). Coordination  
733 of Orofacial Motor Actions into Exploratory Behavior by Rat. *Curr Biol* 27, 688-696,  
734 doi: 10.1016/j.cub.2017.01.013.  
735  
736 Li, Y.Q., Takada, M., Kaneko, T., and Mizuno, N. (1996). GABAergic and glycinergic neurons  
737 projecting to the trigeminal motor nucleus: a double labeling study in the rat. *J Comp Neurol*  
738 373, 498-510,  
739 doi: 10.1002/(SICI)1096-9861(19960930)373:4<498::AID-CNE3>3.0.CO;2-X.  
740  
741 Li, Y.Q., Takada, M., Kaneko, T., and Mizuno, N. (1997). Distribution of GABAergic and  
742 glycinergic premotor neurons projecting to the facial and hypoglossal nuclei in the rat. *J Comp*  
743 *Neurol* 378, 283-294,  
744 doi: 10.1002/(sici)1096-9861(19970210)378:2<283::aid-cne10>3.0.co;2-t.  
745  
746 Limwongse, V., and DeSantis, M. (1977). Cell body locations and axonal pathways of neurons  
747 innervating muscles of mastication in the rat. *Am J Anat* 149, 477-488,  
748 doi: 10.1002/aja.1001490405.  
749  
750 Lu, J., Li, C., Singh-Alvarado, J., Zhou, Z.C., Frohlich, F., Mooney, R., and Wang, F. (2018).  
751 MIN1PIPE: A Miniscope 1-Photon-Based Calcium Imaging Signal Extraction Pipeline. *Cell Rep*  
752 23, 3673-3684,  
753 doi: 10.1016/j.celrep.2018.05.062.  
754

- 755 Matsuyama, M., Ohashi, Y., Tsubota, T., Yaguchi, M., Kato, S., Kobayashi, K., and Miyashita,  
756 Y. (2015). Avian sarcoma leukemia virus receptor-envelope system for simultaneous dissection of  
757 multiple neural circuits in mammalian brain. *Proc Natl Acad Sci U S A* *112*, E2947-2956,  
758 doi: 10.1073/pnas.1423963112.
- 759  
760 McElvain, L.E., Friedman, B., Karten, H.J., Svoboda, K., Wang, F., Deschenes, M., and  
761 Kleinfeld, D. (2018). Circuits in the rodent brainstem that control whisking in concert with other  
762 orofacial motor actions. *Neuroscience* *368*, 152-170,  
763 doi: 10.1016/j.neuroscience.2017.08.034.
- 764  
765 Miyamichi, K., Shlomai-Fuchs, Y., Shu, M., Weissbourd, B.C., Luo, L., and Mizrahi, A. (2013).  
766 Dissecting local circuits: parvalbumin interneurons underlie broad feedback control of olfactory  
767 bulb output. *Neuron* *80*, 1232-1245,  
768 doi: 10.1016/j.neuron.2013.08.027.
- 769  
770 Mizuno, N., Konishi, A., and Sato, M. (1975). Localization of masticatory motoneurons in the  
771 cat and rat by means of retrograde axonal transport of horseradish peroxidase. *J Comp Neurol*  
772 *164*, 105-115,  
773 doi: 10.1002/cne.901640109.
- 774  
775 Mizuno, N., Yasui, Y., Nomura, S., Itoh, K., Konishi, A., Takada, M., and Kudo, M. (1983). A  
776 light and electron microscopic study of premotor neurons for the trigeminal motor nucleus. *J*  
777 *Comp Neurol* *215*, 290-298,  
778 doi: 10.1002/cne.902150305.
- 779  
780 Moore, J.D., Deschenes, M., Furuta, T., Huber, D., Smear, M.C., Demers, M., and Kleinfeld, D.  
781 (2013). Hierarchy of orofacial rhythms revealed through whisking and breathing. *Nature* *497*,  
782 205-210,  
783 doi: 10.1038/nature12076.
- 784  
785 Moore, J.D., Kleinfeld, D., and Wang, F. (2014). How the brainstem controls orofacial behaviors  
786 comprised of rhythmic actions. *Trends Neurosci* *37*, 370-380,  
787 doi: 10.1016/j.tins.2014.05.001.
- 788  
789 Morquette, P., Verdier, D., Kadala, A., Fethiere, J., Philippe, A.G., Robitaille, R., and Kolta, A.  
790 (2015). An astrocyte-dependent mechanism for neuronal rhythmogenesis. *Nat Neurosci* *18*, 844-  
791 854,  
792 doi: 10.1038/nn.4013.
- 793  
794 Nakamura, Y., Yanagawa, Y., Morrison, S.F., and Nakamura, K. (2017). Medullary Reticular  
795 Neurons Mediate Neuropeptide Y-Induced Metabolic Inhibition and Mastication. *Cell Metab* *25*,  
796 322-334,  
797 doi: 10.1016/j.cmet.2016.12.002.
- 798



- 799 Nozaki, S., Iriki, A., and Nakamura, Y. (1986a). Localization of central rhythm generator  
800 involved in cortically induced rhythmical masticatory jaw-opening movement in the guinea pig.  
801 *J Neurophysiol* 55, 806-825,  
802 doi: 10.1152/jn.1986.55.4.806.  
803
- 804 Nozaki, S., Iriki, A., and Nakamura, Y. (1986b). Role of corticobulbar projection neurons in  
805 cortically induced rhythmical masticatory jaw-opening movement in the guinea pig. *J*  
806 *Neurophysiol* 55, 826-845,  
807 doi: 10.1152/jn.1986.55.4.826.  
808
- 809 Petreanu, L., Mao, T., Sternson, S.M., and Svoboda, K. (2009). The subcellular organization of  
810 neocortical excitatory connections. *Nature* 457, 1142-1145,  
811 doi: 10.1038/nature07709.  
812
- 813 Sakurai, K., Zhao, S., Takatoh, J., Rodriguez, E., Lu, J., Leavitt, A.D., Fu, M., Han, B.X., and  
814 Wang, F. (2016). Capturing and Manipulating Activated Neuronal Ensembles with CANE  
815 Delineates a Hypothalamic Social-Fear Circuit. *Neuron* 92, 739-753,  
816 doi: 10.1016/j.neuron.2016.10.015.  
817
- 818 Sandler, V.M., Puil, E., and Schwarz, D.W. (1998). Intrinsic response properties of bursting  
819 neurons in the nucleus principalis trigemini of the gerbil. *Neuroscience* 83, 891-904,  
820 doi: 10.1016/s0306-4522(97)00415-6.  
821
- 822 Shamash, P., Carandini, M., Harris, K., and Steinmetz, N. (2018). A tool for analyzing electrode  
823 tracks from slice histology. *bioRxiv*, 447995,  
824 doi: 10.1101/447995.  
825
- 826 Sreenivasan, V., Karmakar, K., Rijli, F.M., and Petersen, C.C. (2015). Parallel pathways from  
827 motor and somatosensory cortex for controlling whisker movements in mice. *Eur J Neurosci* 41,  
828 354-367,  
829 doi: 10.1111/ejn.12800.  
830
- 831 Stanek, E., 4th, Rodriguez, E., Zhao, S., Han, B.X., and Wang, F. (2016). Supratrigeminal  
832 Bilaterally Projecting Neurons Maintain Basal Tone and Enable Bilateral Phasic Activation of  
833 Jaw-Closing Muscles. *J Neurosci* 36, 7663-7675,  
834 doi: 10.1523/JNEUROSCI.0839-16.2016.  
835
- 836 Stanek, E.t., Cheng, S., Takatoh, J., Han, B.X., and Wang, F. (2014). Monosynaptic premotor  
837 circuit tracing reveals neural substrates for oro-motor coordination. *Elife* 3, e02511,  
838 doi: 10.7554/eLife.02511.  
839
- 840 Stepien, A.E., Tripodi, M., and Arber, S. (2010). Monosynaptic rabies virus reveals premotor  
841 network organization and synaptic specificity of cholinergic partition cells. *Neuron* 68, 456-472,  
842 doi: 10.1016/j.neuron.2010.10.019.  
843

- 844 Takatoh, J., Nelson, A., Zhou, X., Bolton, M.M., Ehlers, M.D., Arenkiel, B.R., Mooney, R., and  
845 Wang, F. (2013). New modules are added to vibrissal premotor circuitry with the emergence of  
846 exploratory whisking. *Neuron* 77, 346-360,  
847 doi: 10.1016/j.neuron.2012.11.010.  
848
- 849 Terashima, T., Kishimoto, Y., and Ochiishi, T. (1993). Musculotopic organization of the facial  
850 nucleus of the reeler mutant mouse. *Brain Res* 617, 1-9,  
851 doi: 10.1016/0006-8993(93)90605-m.  
852
- 853 Tervo, D.G., Hwang, B.Y., Viswanathan, S., Gaj, T., Lavzin, M., Ritola, K.D., Lindo, S.,  
854 Michael, S., Kuleshova, E., Ojala, D., Huang, C.C., Gerfen, C.R., Schiller, J., Dudman, J.T.,  
855 Hantman, A.W., Looger, L.L., Schaffer, D.V., and Karpova, A.Y. (2016). A Designer AAV  
856 Variant Permits Efficient Retrograde Access to Projection Neurons. *Neuron* 92, 372-382,  
857 doi: 10.1016/j.neuron.2016.09.021.  
858
- 859 Travers, J.B., DiNardo, L.A., and Karimnamazi, H. (2000). Medullary reticular formation  
860 activity during ingestion and rejection in the awake rat. *Exp Brain Res* 130, 78-92,  
861 doi: 10.1007/s002219900223.  
862
- 863 Travers, J.B., Herman, K., and Travers, S.P. (2010). Suppression of third ventricular NPY-  
864 elicited feeding following medullary reticular formation infusions of muscimol. *Behav Neurosci*  
865 124, 225-233,  
866 doi: 10.1037/a0018928.  
867
- 868 Travers, J.B., and Norgren, R. (1983). Afferent projections to the oral motor nuclei in the rat. *J*  
869 *Comp Neurol* 220, 280-298,  
870 doi: 10.1002/cne.902200303.  
871
- 872 Tripodi, M., Stepien, A.E., and Arber, S. (2011). Motor antagonism exposed by spatial  
873 segregation and timing of neurogenesis. *Nature* 479, 61-66,  
874 doi: 10.1038/nature10538.  
875
- 876 Tsuboi, A., Kolta, A., Chen, C.C., and Lund, J.P. (2003). Neurons of the trigeminal main sensory  
877 nucleus participate in the generation of rhythmic motor patterns. *Eur J Neurosci* 17, 229-238,  
878 doi: 10.1046/j.1460-9568.2003.02450.x.  
879
- 880 Vornov, J.J., and Sutin, J. (1983). Brainstem projections to the normal and noradrenergically  
881 hyperinnervated trigeminal motor nucleus. *J Comp Neurol* 214, 198-208,  
882 doi: 10.1002/cne.902140207.  
883
- 884 Wang, P., Chen, T., Sakurai, K., Han, B.X., He, Z., Feng, G., and Wang, F. (2012). Intersectional  
885 Cre driver lines generated using split-intein mediated split-Cre reconstitution. *Sci Rep* 2, 497,  
886 doi: 10.1038/srep00497.  
887
- 888 Wang, Q., Ding, S.L., Li, Y., Royall, J., Feng, D., Lesnar, P., Graddis, N., Naeemi, M., Facer, B.,  
889 Ho, A., Dolbeare, T., Blanchard, B., Dee, N., Wakeman, W., Hirokawa, K.E., Szafer, A., Sunkin,

890 S.M., Oh, S.W., Bernard, A., Phillips, J.W., Hawrylycz, M., Koch, C., Zeng, H., Harris, J.A., and  
891 Ng, L. (2020). The Allen Mouse Brain Common Coordinate Framework: A 3D Reference Atlas.  
892 *Cell* *181*, 936-953 e920,  
893 doi: 10.1016/j.cell.2020.04.007.  
894  
895 Watson, C.R., Sakai, S., and Armstrong, W. (1982). Organization of the facial nucleus in the rat.  
896 *Brain Behav Evol* *20*, 19-28,  
897 doi: 10.1159/000121578.  
898  
899 Welker, W. (1964). Analysis of sniffing of the albino rat 1. *Behaviour* *22*, 223-244,  
900 .  
901  
902 Westberg, K.G., Sandstrom, G., and Olsson, K.A. (1995). Integration in trigeminal premotor  
903 interneurons in the cat. 3. Input characteristics and synaptic actions of neurones in subnucleus-  
904 gamma of the oral nucleus of the spinal trigeminal tract with a projection to the masseteric  
905 motoneurone subnucleus. *Exp Brain Res* *104*, 449-461,  
906 doi: 10.1007/BF00231979.  
907  
908 Westneat, M.W., and Hall, W.G. (1992). Ontogeny of feeding motor patterns in infant rats: an  
909 electromyographic analysis of suckling and chewing. *Behav Neurosci* *106*, 539-554,  
910 doi: 10.1037//0735-7044.106.3.539.  
911  
912 Wickersham, I.R., Lyon, D.C., Barnard, R.J., Mori, T., Finke, S., Conzelmann, K.K., Young,  
913 J.A., and Callaway, E.M. (2007). Monosynaptic restriction of transsynaptic tracing from single,  
914 genetically targeted neurons. *Neuron* *53*, 639-647,  
915 doi: 10.1016/j.neuron.2007.01.033.  
916  
917 Yang, C.F., and Feldman, J.L. (2018). Efferent projections of excitatory and inhibitory  
918 preBotzinger Complex neurons. *J Comp Neurol* *526*, 1389-1402,  
919 doi: 10.1002/cne.24415.  
920  
921 Yoshida, A., Yasuda, K., Dostrovsky, J.O., Bae, Y.C., Takemura, M., Shigenaga, Y., and Sessle,  
922 B.J. (1994). Two major types of premotoneurons in the feline trigeminal nucleus oralis as  
923 demonstrated by intracellular staining with horseradish peroxidase. *J Comp Neurol* *347*, 495-  
924 514,  
925 doi: 10.1002/cne.903470403.  
926  
927

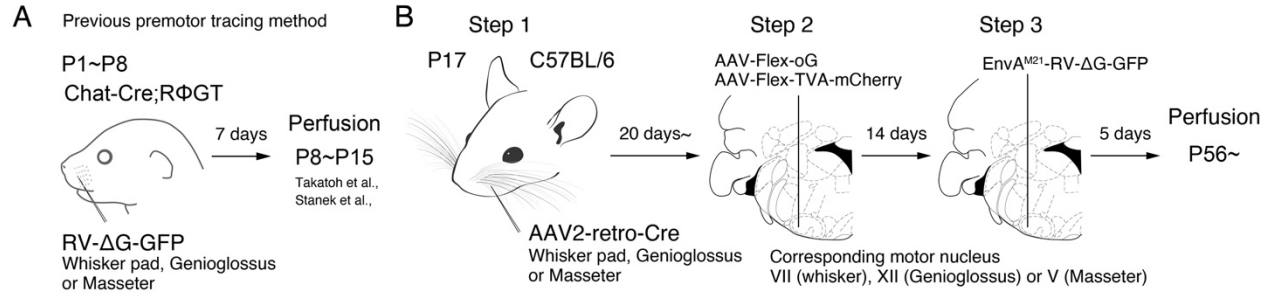

928  
929

930 **Figure 1. Monosynaptic rabies virus tracing strategy for labeling adult orofacial premotor**  
931 **circuits. (A)** Schematic of previously used monosynaptic premotor transsynaptic tracing method  
932 in neonatal mice. **(B)** Schematic of the three-step monosynaptic premotor tracing strategy in  
933 adult mice developed in this study.



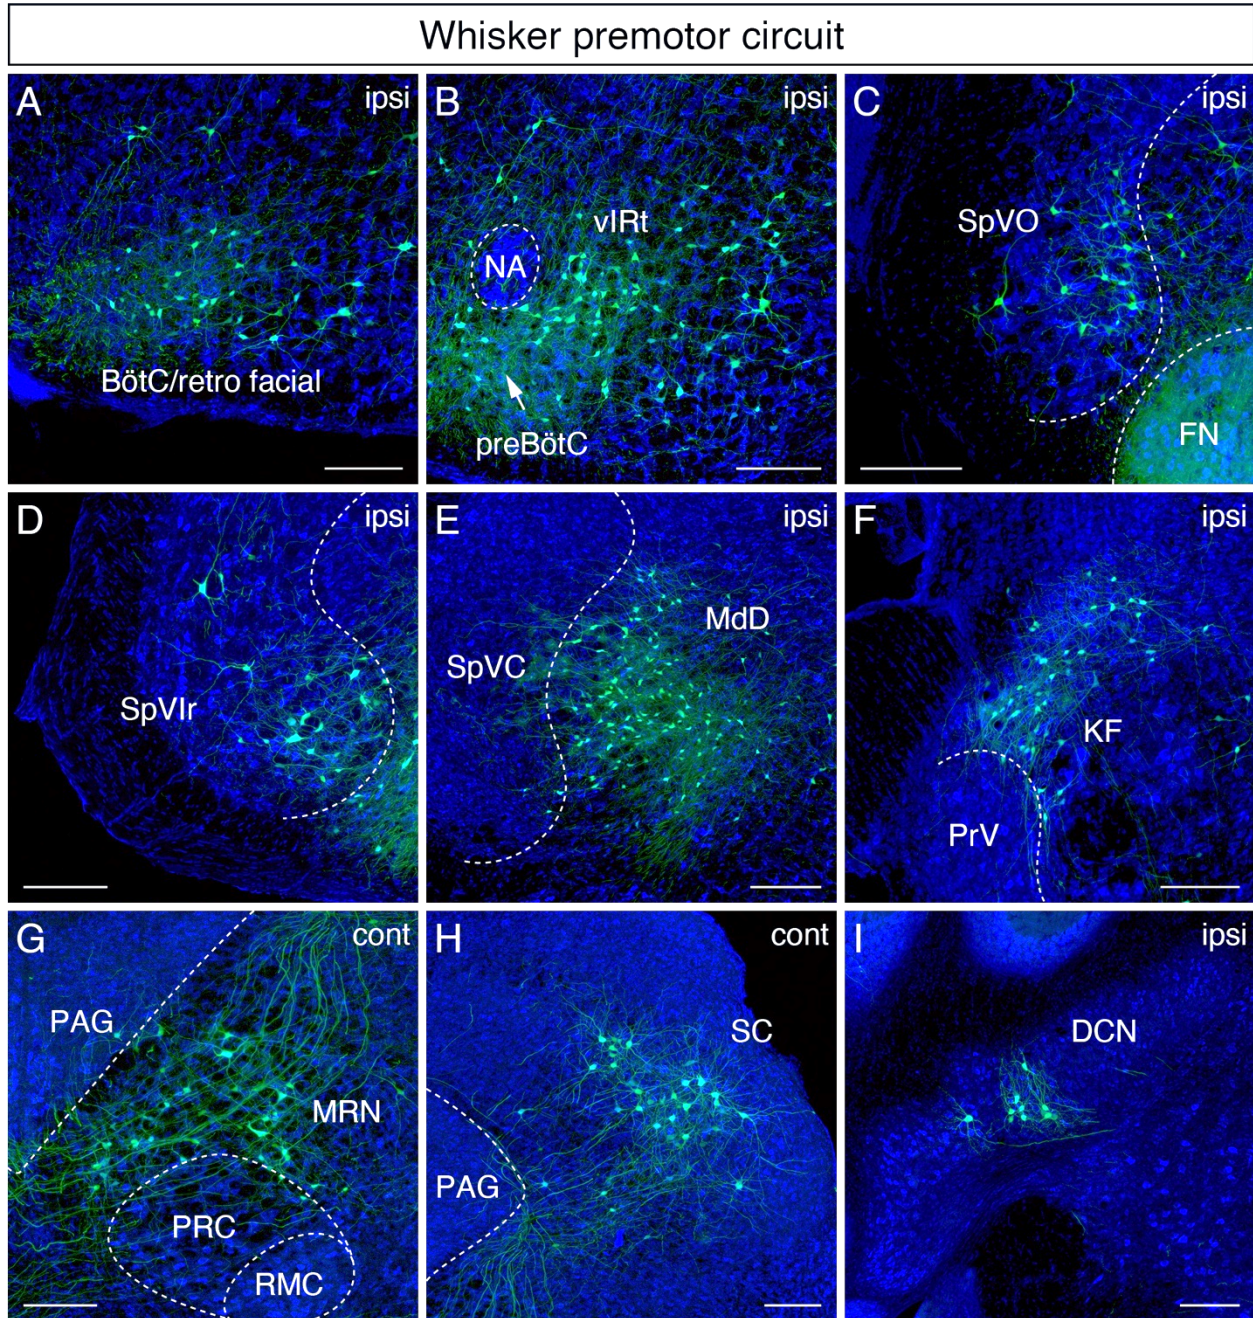

934

935

936 **Figure 2. Monosynaptic tracing results of whisker premotor neurons in adult mice.**

937 Representative images of traced whisker premotor neurons on coronal sections. Sections were  
938 counterstained with fluorescent Nissl (blue). Labeled neurons shown in the ipsilateral  
939 BötC/retrofacial area (A), PreBötC (arrow) and vibrissal intermediate reticular formation (vIRt)  
940 (B), Spinal trigeminal nucleus oralis (SpVO) (C), rostral part of spinal trigeminal nucleus  
941 interpolaris (SpVlr) (D), medullary reticular nucleus dorsal (MdD) located medial to spinal

942 trigeminal nucleus caudalis (SpVC) (**E**), Kölliker-Fuse (KF) (**F**), contralateral midbrain reticular  
943 nucleus (MRN) located dorsal to the red nucleus parvicellular region (RPC) (**G**), contralateral  
944 superior colliculus (SC) (**H**), and ipsilateral deep cerebellar nucleus (DCN) (**I**). Scale bars, 200  
945  $\mu\text{m}$ .



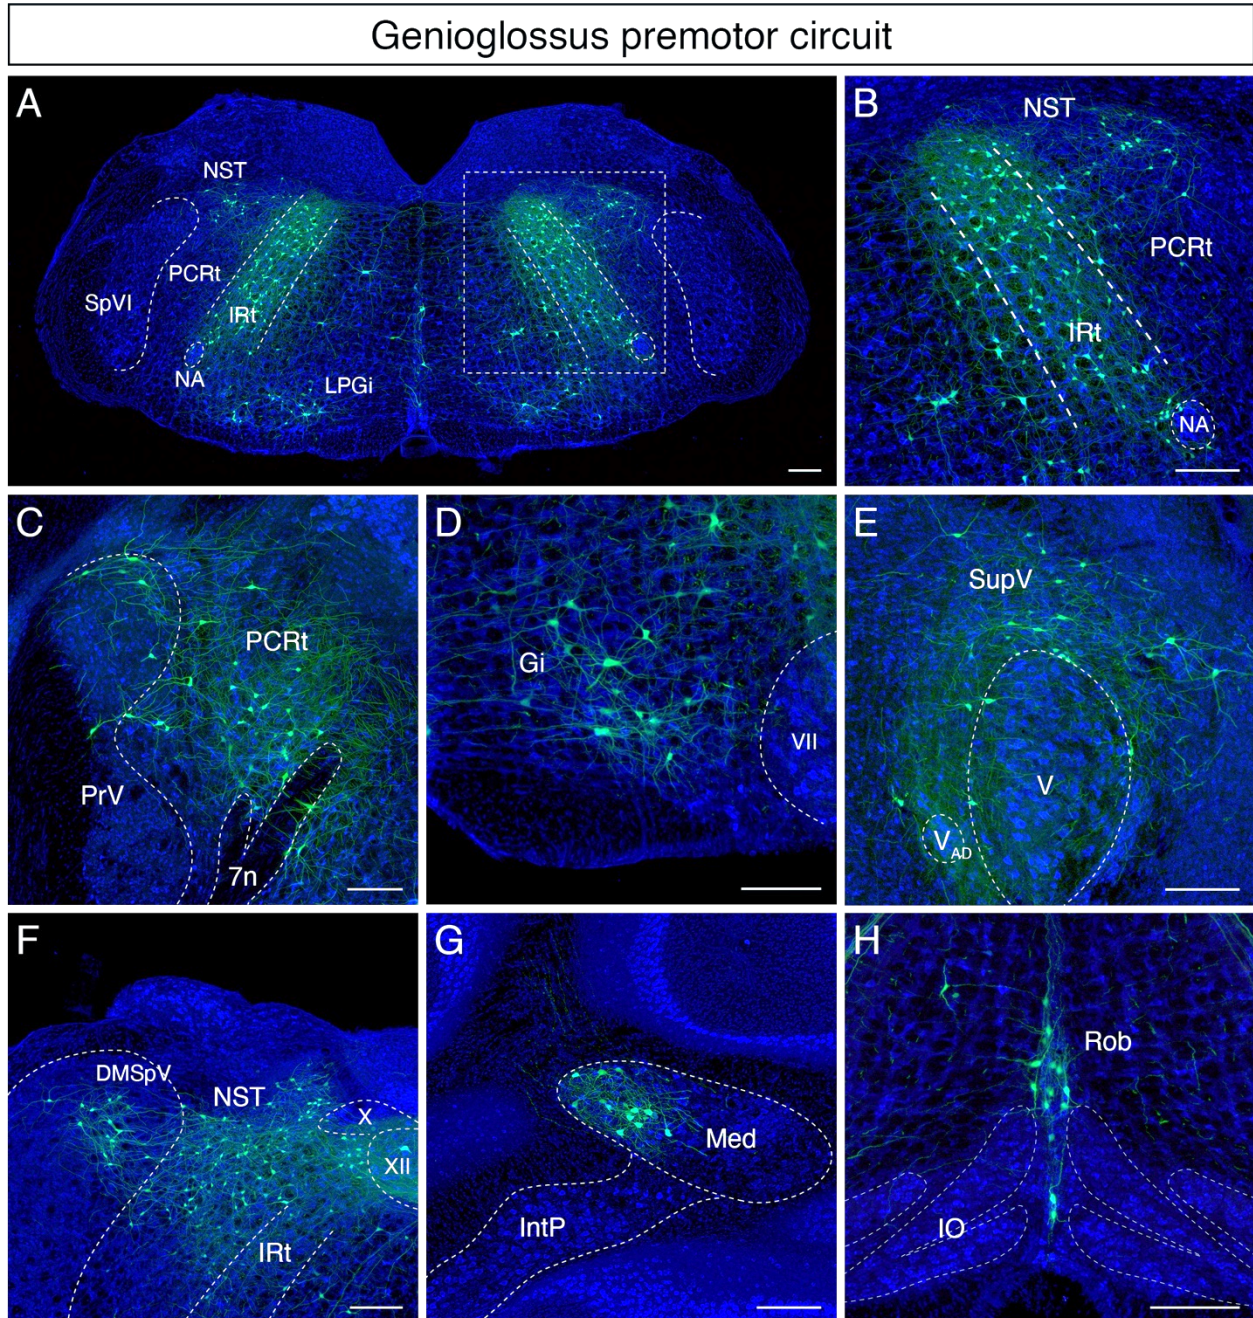

946  
947

948 **Figure 3. Monosynaptic tracing results of tongue-protruding genioglossus premotor**  
949 **neurons in adult mice.**

950 Representative images of traced genioglossus premotor neurons on coronal sections. Sections  
951 were counterstained with fluorescent Nissl (blue). Labeled neurons are shown in the dorsal  
952 intermediate reticular nucleus (IRt), nucleus of solitary tract (NST), lateral paragigantocellular  
953 nucleus (LPGi) at the anterior-posterior level between VII and XII (A, magnified view of the  
954 boxed area in A is shown in B), parvicellular reticular nucleus (PCRt), dorsal region of the



955 principal trigeminal nucleus (PrV) (**C**), Gigangtocellular reticular nucleus (Gi) (**D**), supra-  
956 trigeminal region (SupV) (**E**), dorsomedial part of spinal trigeminal nucleus (DMSpV), rostral  
957 NST at the anterior-posterior level of the anterior part of XII (**F**), the medial subnucleus of the  
958 deep cerebellar nucleus (DCN) (**G**), and raphe obscurus nucleus (Rob) (**H**). Scale bars, 200  $\mu$ m.

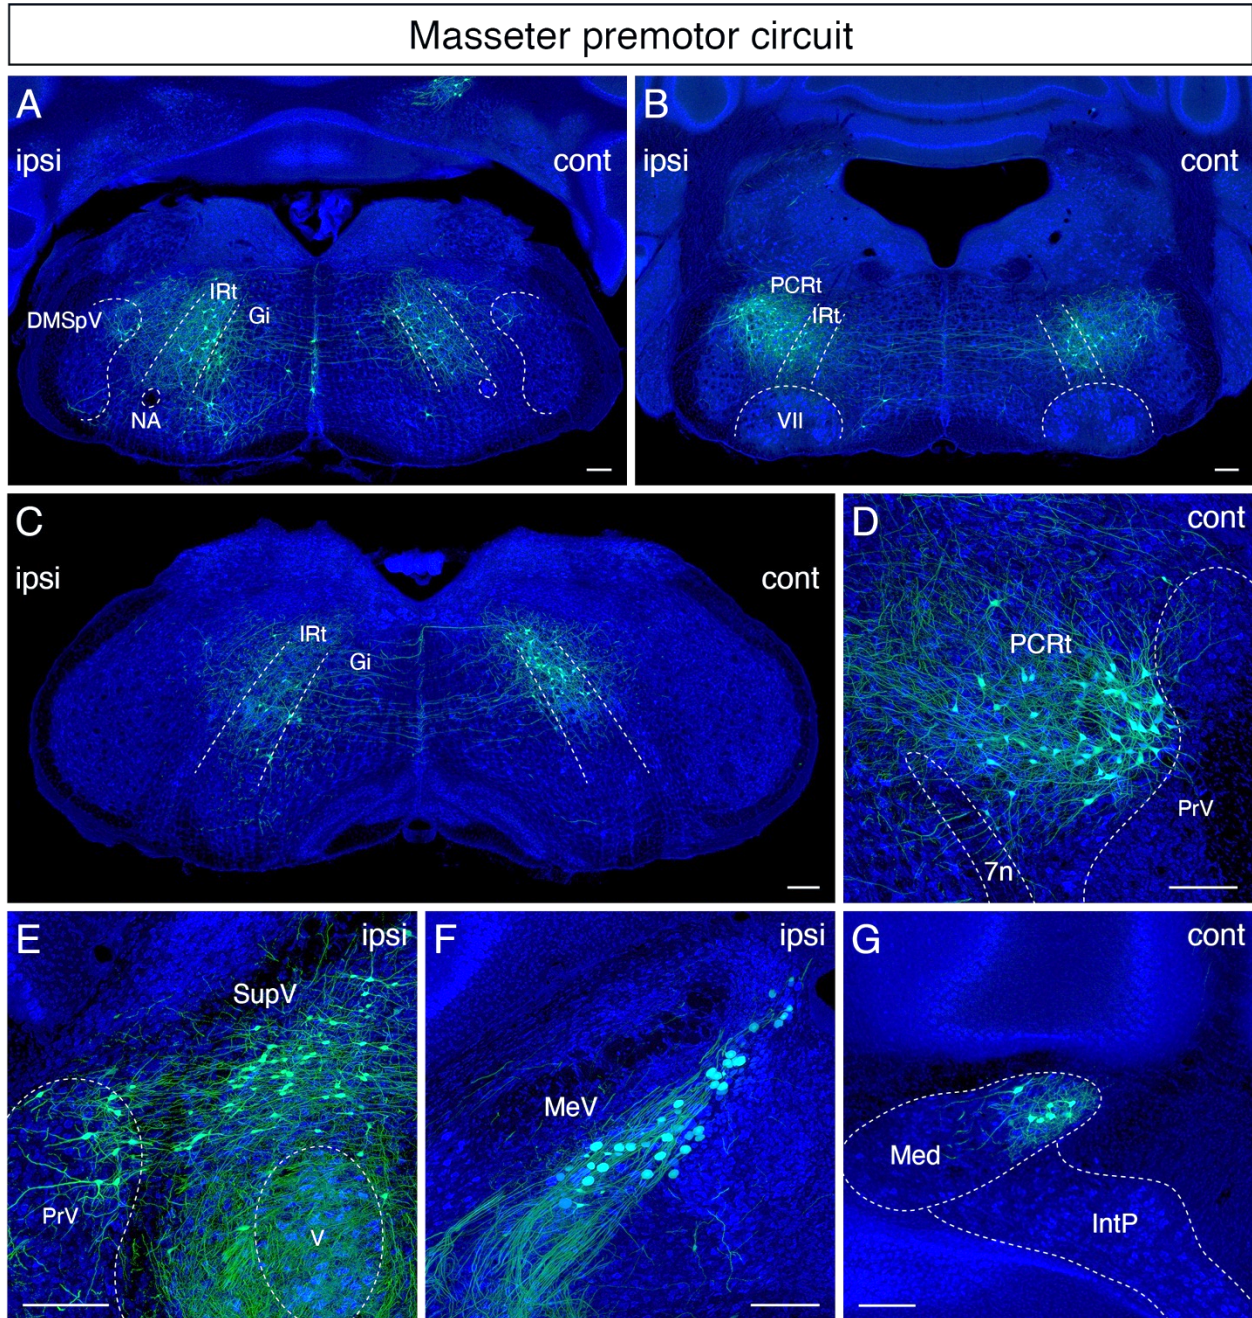

959

960

961 **Figure 4. Monosynaptic tracing results of jaw-closing masseter premotor neurons in adult**  
962 **mice.**

963 Representative images of traced masseter premotor neurons on coronal sections. Sections were  
964 counterstained with fluorescent Nissl (blue). Labeled neurons are observed bilaterally in the the  
965 dorsal intermediate reticular nucleus (dorsal IRt), in dorsomedial part of spinal trigeminal  
966 nucleus DMSpV at the anterior-posterior level between VII and XII (A), bilaterally in the dorsal

967 IRt, PCRt at the anterior-posterior level of VII (**B**), contralaterally in the dorsal IRt at the  
968 anterior-posterior level of the anterior part of XII (**C**), PCRt (**D**), SupV, dorsal PrV (**E**),  
969 ipsilateral mesencephalic nucleus MeV (**F**), PCRt, dorsal PrV (**C**), Gi (**D**), SupV (**E**) and the  
970 contralateral medial subnucleus of DCN (**G**). Scale bars, 200  $\mu$ m.



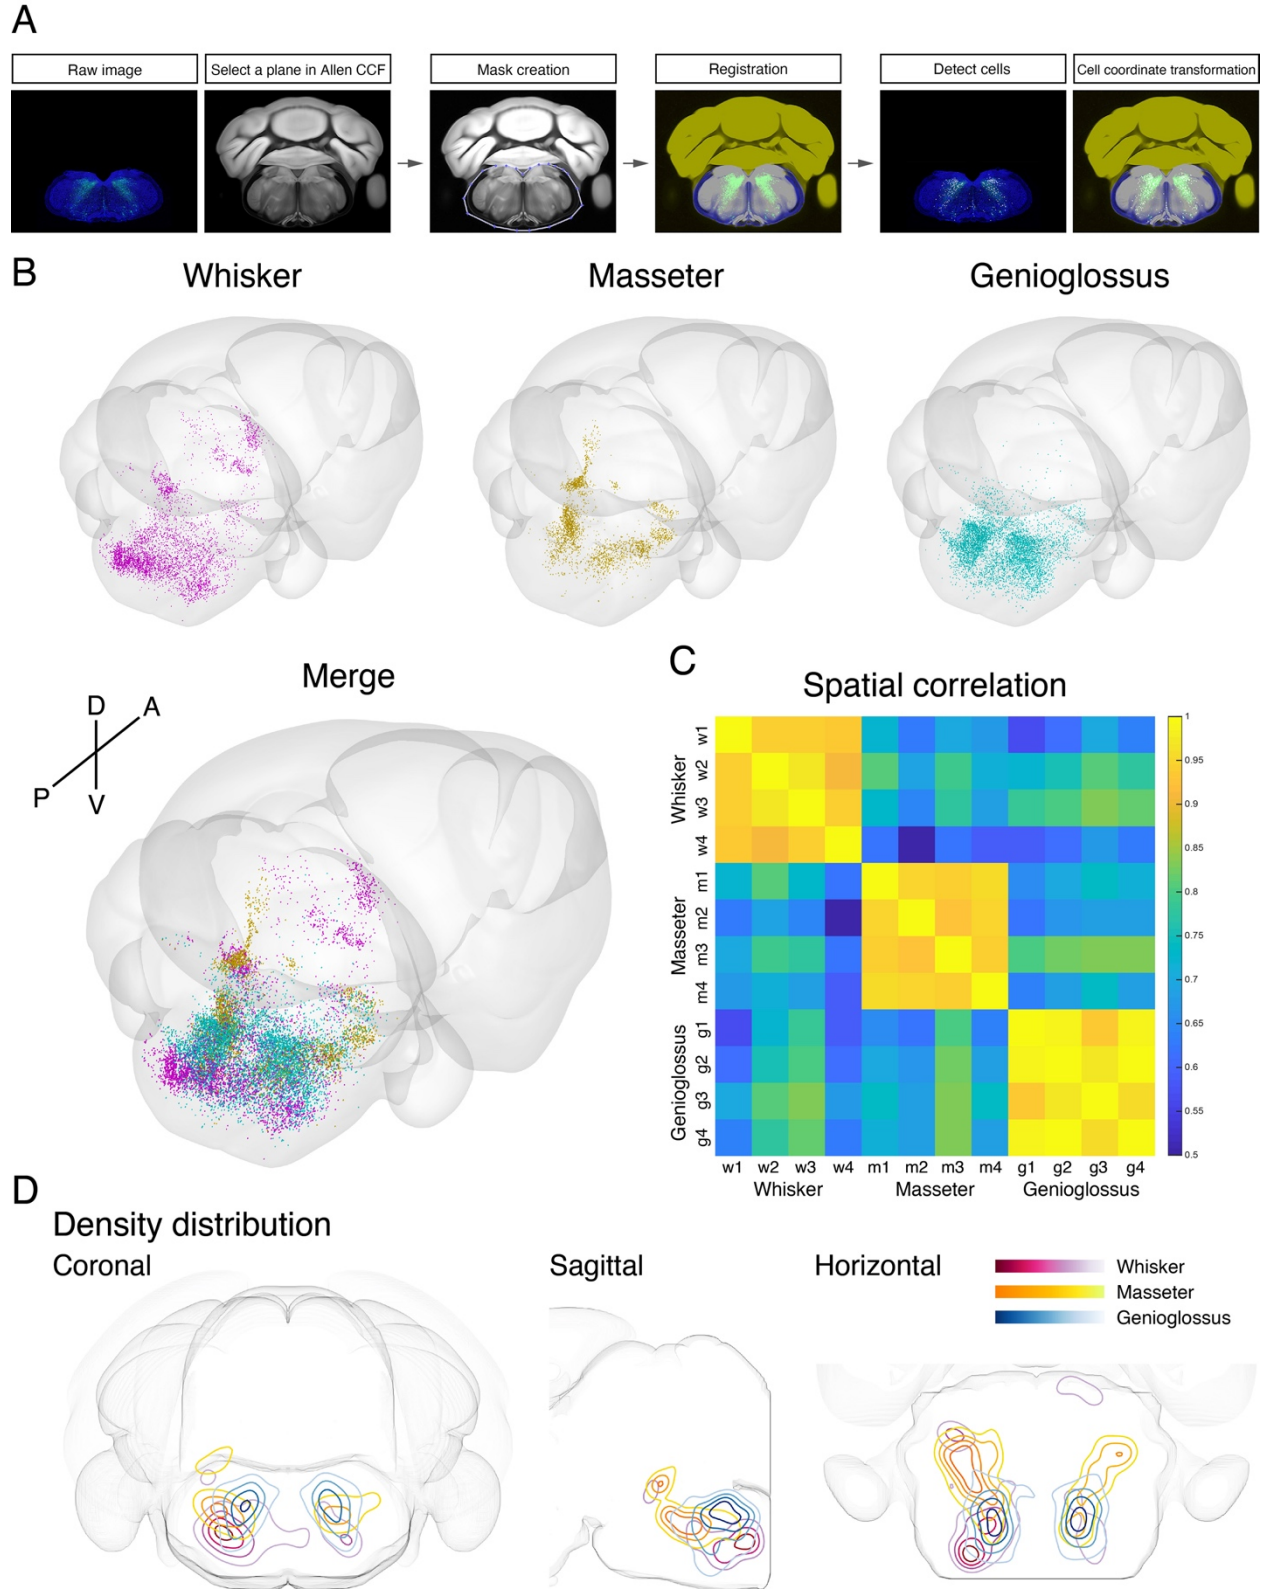

971

972

973 **Figure 5. Co-registration and comparison of the spatial distributions of whisker,**  
974 **genioglossus, and masseter premotor circuits in Allen Common Coordinate Framework.**  
975 (A) Procedure for mapping orofacial premotor neurons to Allen CCF. (B) Reconstructed  
976 representative whisker (magenta), masseter (gold), and genioglossus (cyan) premotor circuits in  
977 Allen CCF (top). Merged image (bottom). (C) Cross-correlation analysis of the spatial  
978 distribution patterns of individual animals. whisker (w1 - w4, n = 4), masseter (m1 - m4, n = 4),  
979 and genioglossus (g1 - g4, n = 4) premotor circuits. (D) 2D contour density analysis of  
980 representative whisker (magenta), masseter (yellow), and genioglossus (blue) premotor circuits.

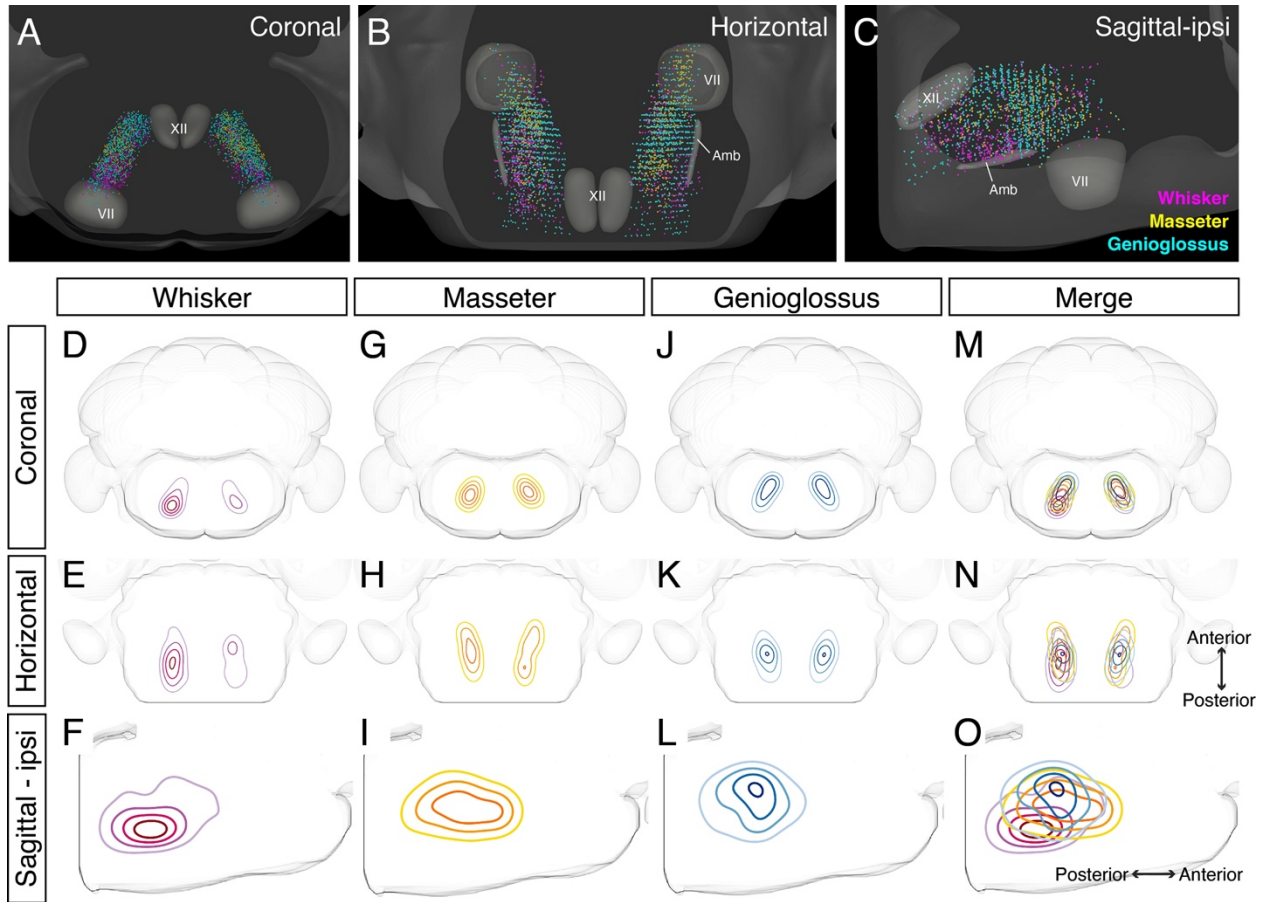

981  
982

983 **Figure 6. Detailed comparison of spatial organizations of orofacial premotor circuits within**  
984 **IRt.**

985 (A-C) Distribution of whisker (magenta), masseter (gold), and genioglossus (cyan) premotor  
986 neurons within IRt from representative animals in coronal (A), horizontal (B), and sagittal (C)  
987 planes. (D-O) Density analysis of whisker (D-F, magenta, an average of 4 mice), masseter (G-I,  
988 yellow, an average of 4 mice), genioglossus (J-L, blue, an average of 4 mice) premotor neuron  
989 distributions. Merged images (M-O).



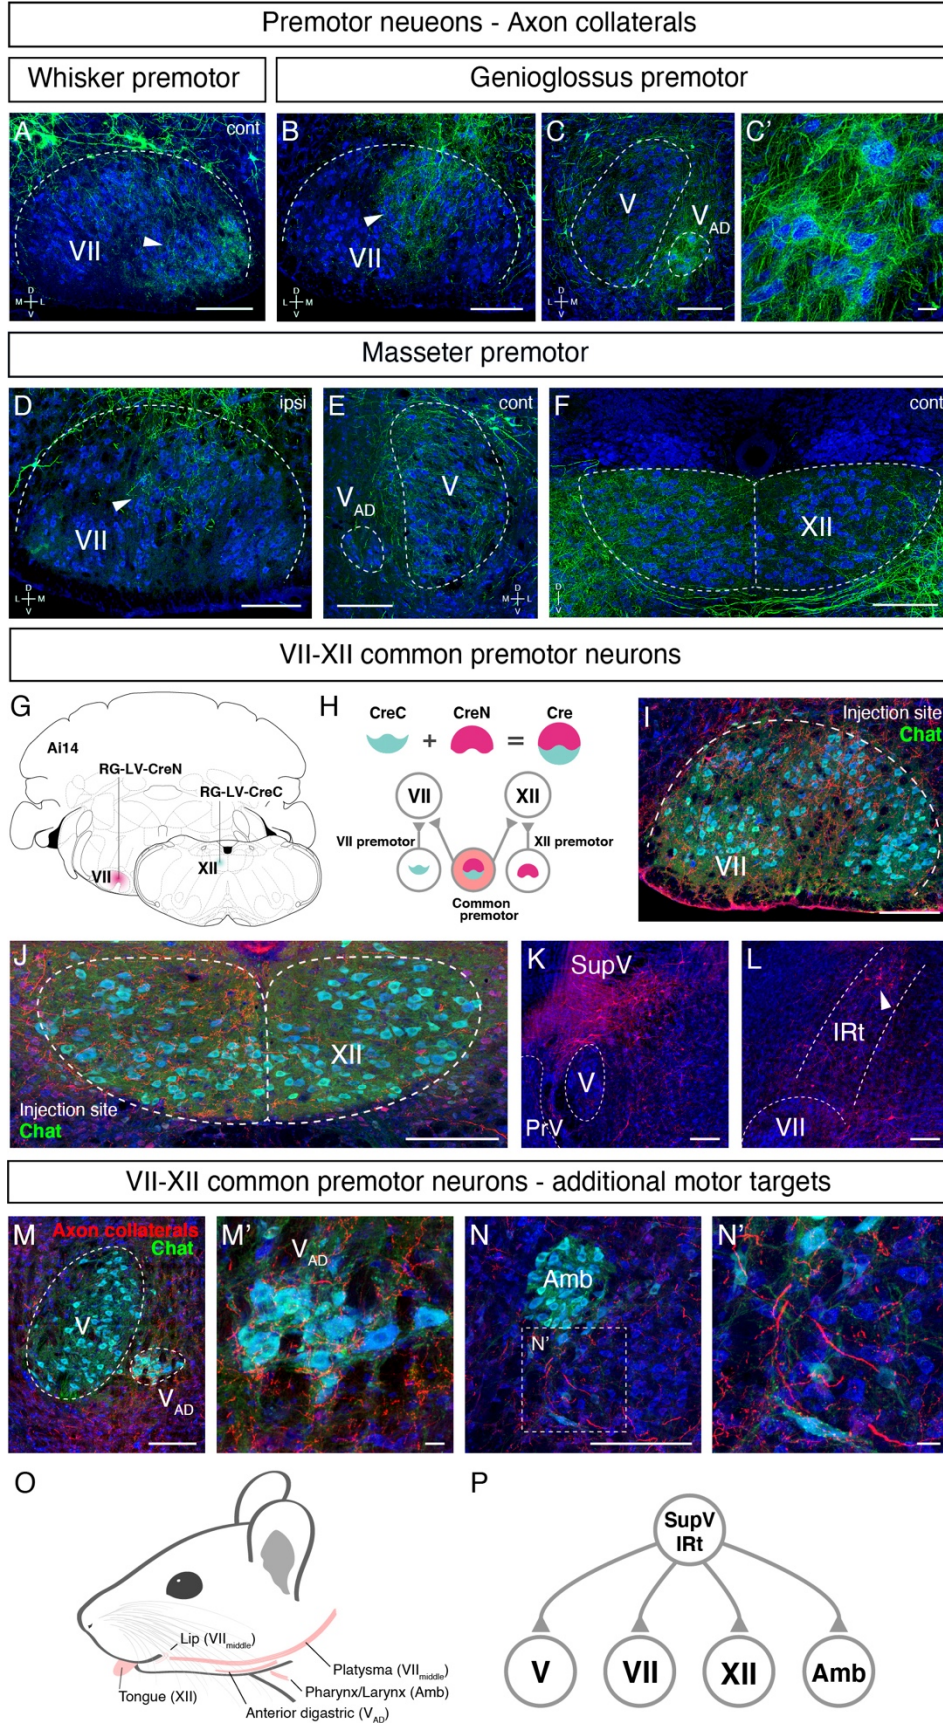

991 **Figure 7. Common premotor neurons innervate multiple distinct orofacial motor nuclei**  
992 (A-F) Representative images of axon collaterals from rabies labeled premotor neurons traced  
993 from one muscle innervating other orofacial motor nuclei. Sections were counterstained with  
994 fluorescent Nissl (blue). (A) Axon collaterals from *ipsilateral* whisker premotor neurons  
995 innervate the *contralateral* whisker motoneurons in the lateral part of VII (arrowhead). (B-C')  
996 Axon collaterals of some genioglossus premotor neurons also innervate the middle part of  
997 VII<sub>middle</sub> (arrowhead, B), and innervate the anterior digastric part of V (V<sub>AD</sub>) (C, magnified view  
998 is shown in C'). (D-F) Axon collaterals from masseter premotor neurons also innervate the  
999 middle part of VII<sub>middle</sub> (D), the contralateral V (E), and the dorsal part of XII (F).  
1000 (G-P) Identifying VII<sub>middle</sub>-XII common premotor neurons. (G, H) Schematic of split-Cre tracing  
1001 strategy. (G) RG-LV-CreN and RG-LV-CreC were injected into the left side of VII<sub>middle</sub> and XII  
1002 of Ai 14 mice, respectively. (H) Cre is reconstituted only in neurons innervating both VII<sub>middle</sub>  
1003 and XII, and which induces tdTomato reporter expression. (I, J) Representative images of  
1004 axons/axon collaterals in the injection sites. Sections were counterstained with fluorescent Nissl  
1005 (blue). Motoneurons were stained with anti-chat antibody (green). VII (I). XII (J). (K, L)  
1006 Representative images of VII<sub>middle</sub>-XII common premotor neurons in SupV (K) and the dorsal  
1007 IRt (L). (M-N') Representative images of axon collaterals from VII<sub>middle</sub>-XII common premotor  
1008 neurons in V<sub>AD</sub> (M, magnified view in M') and Amb (N, magnified view N'). Scale bars, 200 μm  
1009 (A-F, I-N); 20 μm (C', M', N'). (O) Schematic showing orofacial muscle targets of motor  
1010 nuclei. (P) Schematic of all motor nuclei innervated by VII<sub>middle</sub>-XII common premotor neuron in  
1011 SupV and IRt.

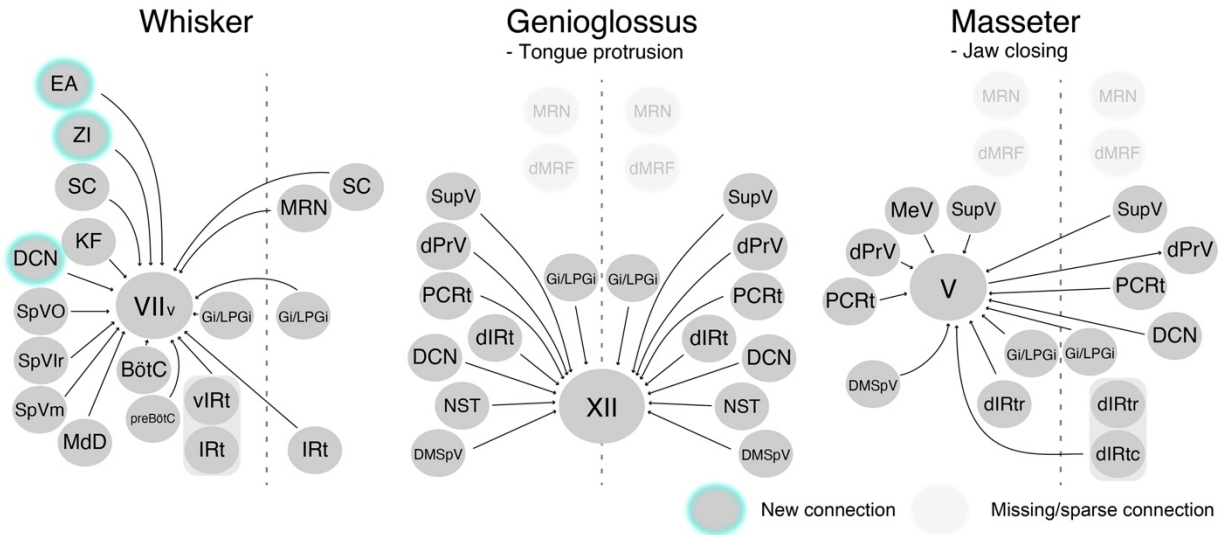

1012

1013 **Figure 8. Schematic of whisker, tongue-protruding genioglossus, and jaw-closing premotor**  
1014 **circuits in the adult mice.**

1015 Newly emerged connections in adults that were not observed in neonates are outlined in

1016 turquoise. Neonatal connections that appear lost or becoming sparse are shown as translucent

1017 spheres.





1039

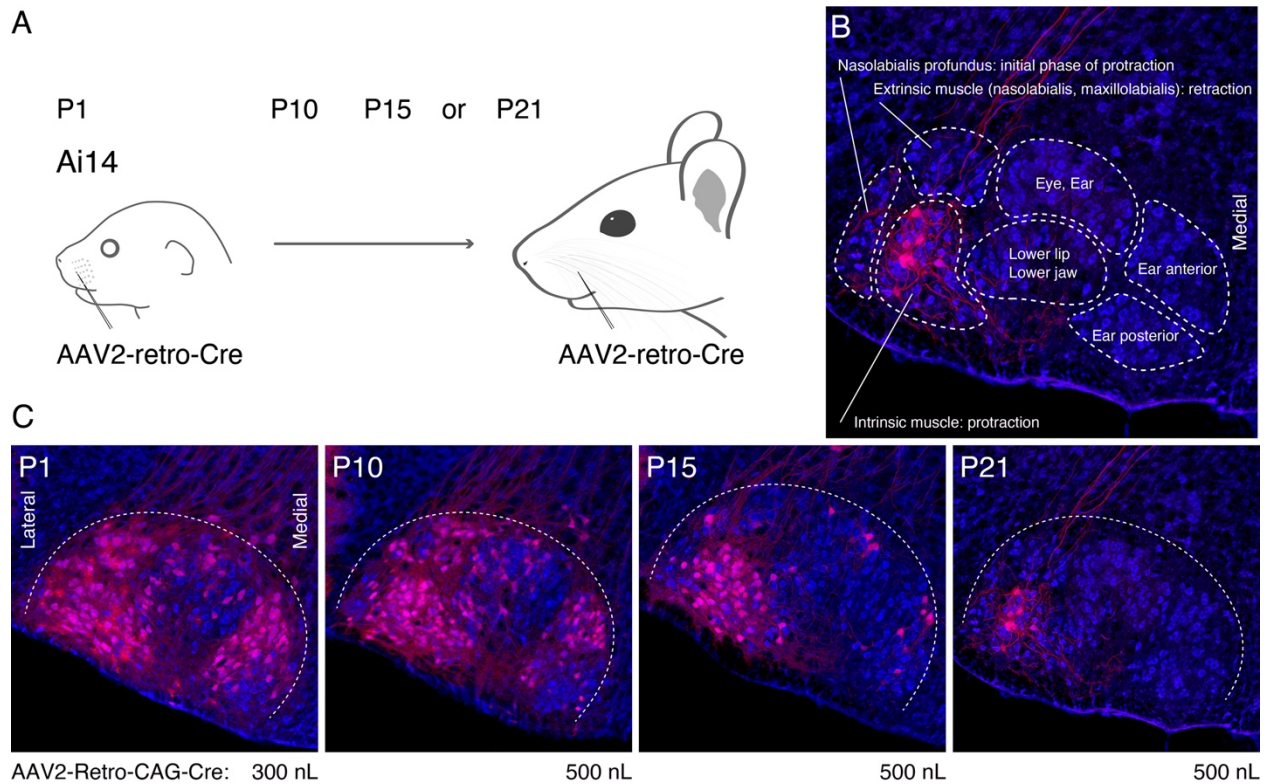

1040

1041

1042 (A) Schematic of AAV2-retro-Cre injection. AAV2-retro-Cre is injected into the whisker pad of

1043 Ai14 mice at P1, P10, P15, or P21. (B) Subnuclei of VII. Each subnucleus is circled by dotted

1044 lines. Peripheral muscle targets are shown in each subnucleus.

1045 Motoneurons in the lateral part of VII (red) are labeled by AAV2-retro-Cre injection at P21. (C)

1046 Labeling patterns from P1, P10, P15, or P21 injected animals. Injection volumes of AAV2-retro-

1047 Cre are shown under each panel. Sections were counterstained with fluorescent Nissl (blue).

1048

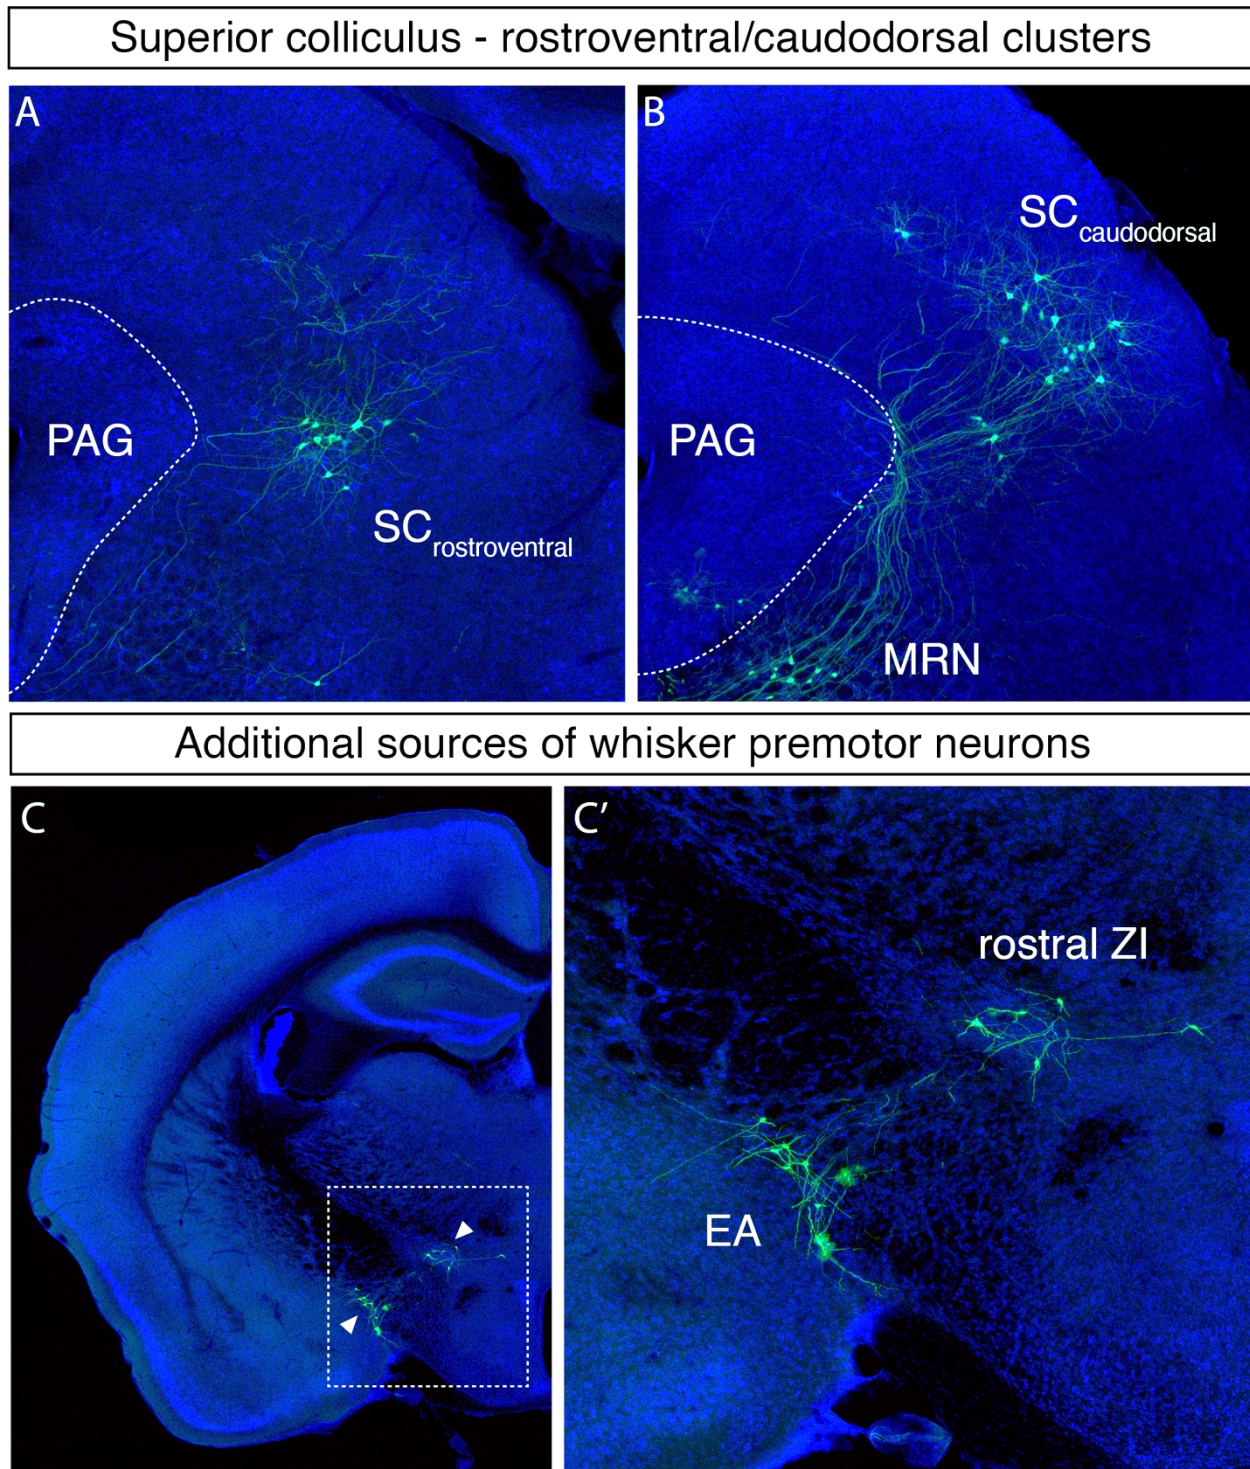

1049

1050

1051

**Figure supplement 2. Additional whisker premotor inputs.**

1052

(A, B) Labeled neurons in the rostral (A) and caudal superior colliculus (B).



1053 (C) Labeled neurons are observed in the rostral zona incerta (ZI) and extended amygdala (EA) (a  
1054 magnified image of the boxed area is shown in **D'**).

## Whisker premotor neurons

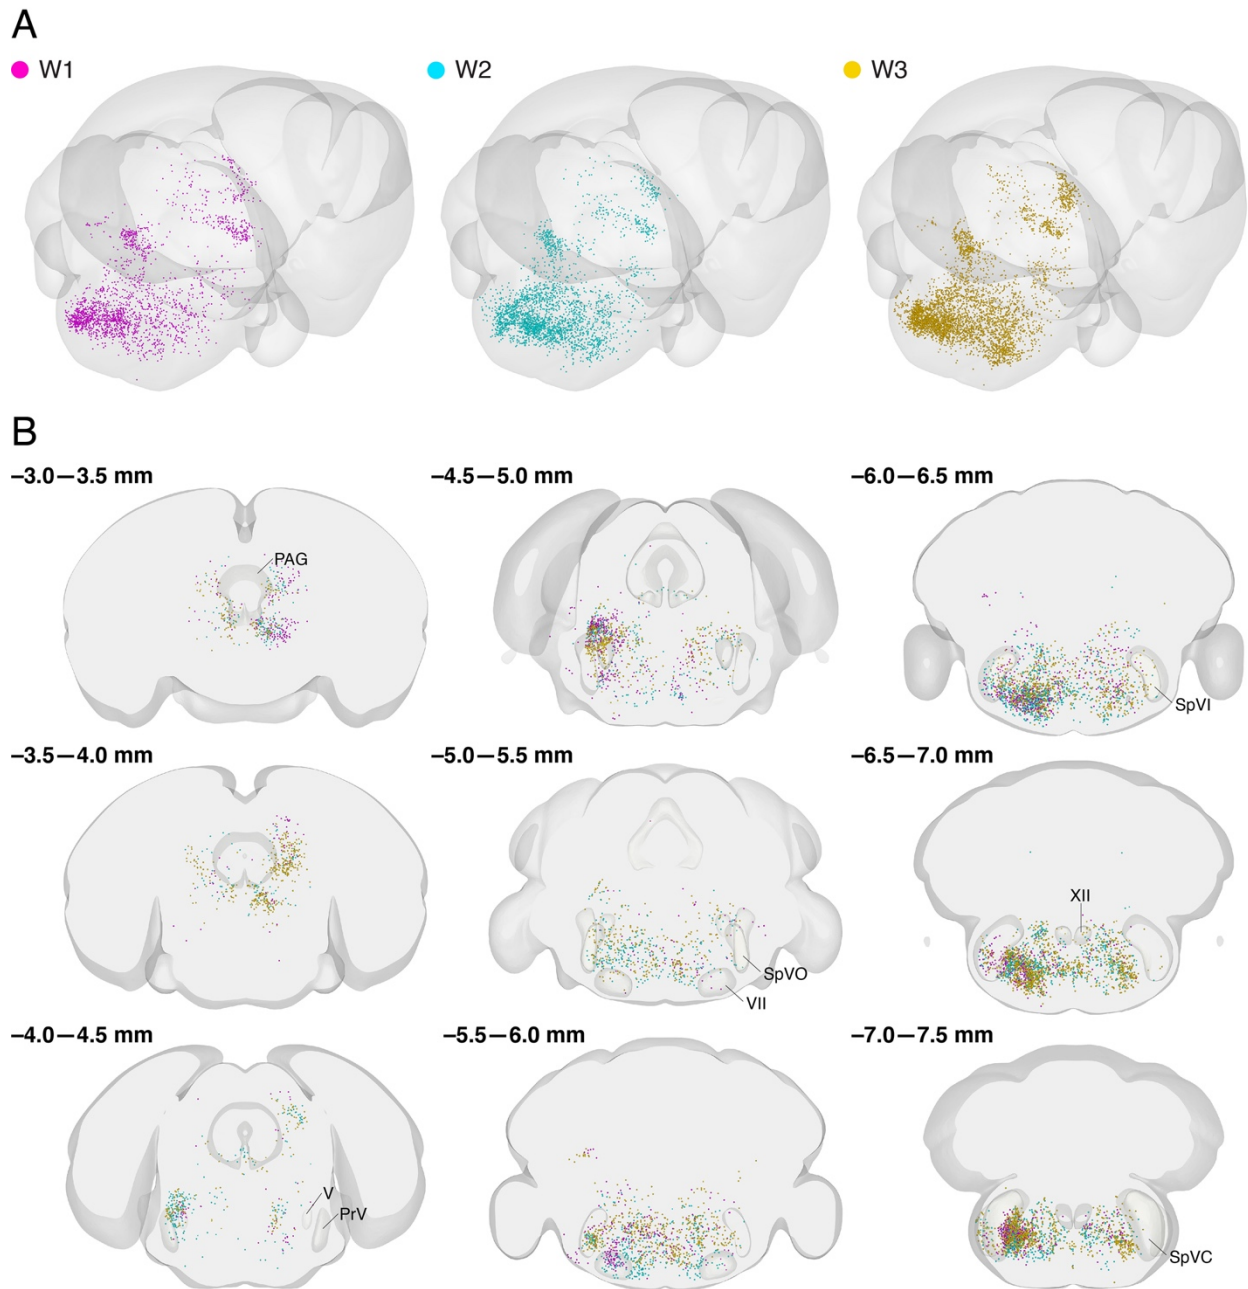

1055

1056

1057 **Figure supplement 3. Distribution of labeled whisker premotor neurons from individual**  
1058 **animals in Allen CCF.**

1059 (A) 3D reconstruction of labeled whisker premotor neurons with posterior oblique view from 3  
1060 different mice (W1 magenta, W2 cyan, W3 gold). (B) Coronal views of reconstructed whisker

- 1061 premotor neurons from all three mice in the same coordinates. Anterior-posterior levels  
1062 (referenced to Bregma) are shown on the top left of each panel.

## Genioglossus premotor neurons

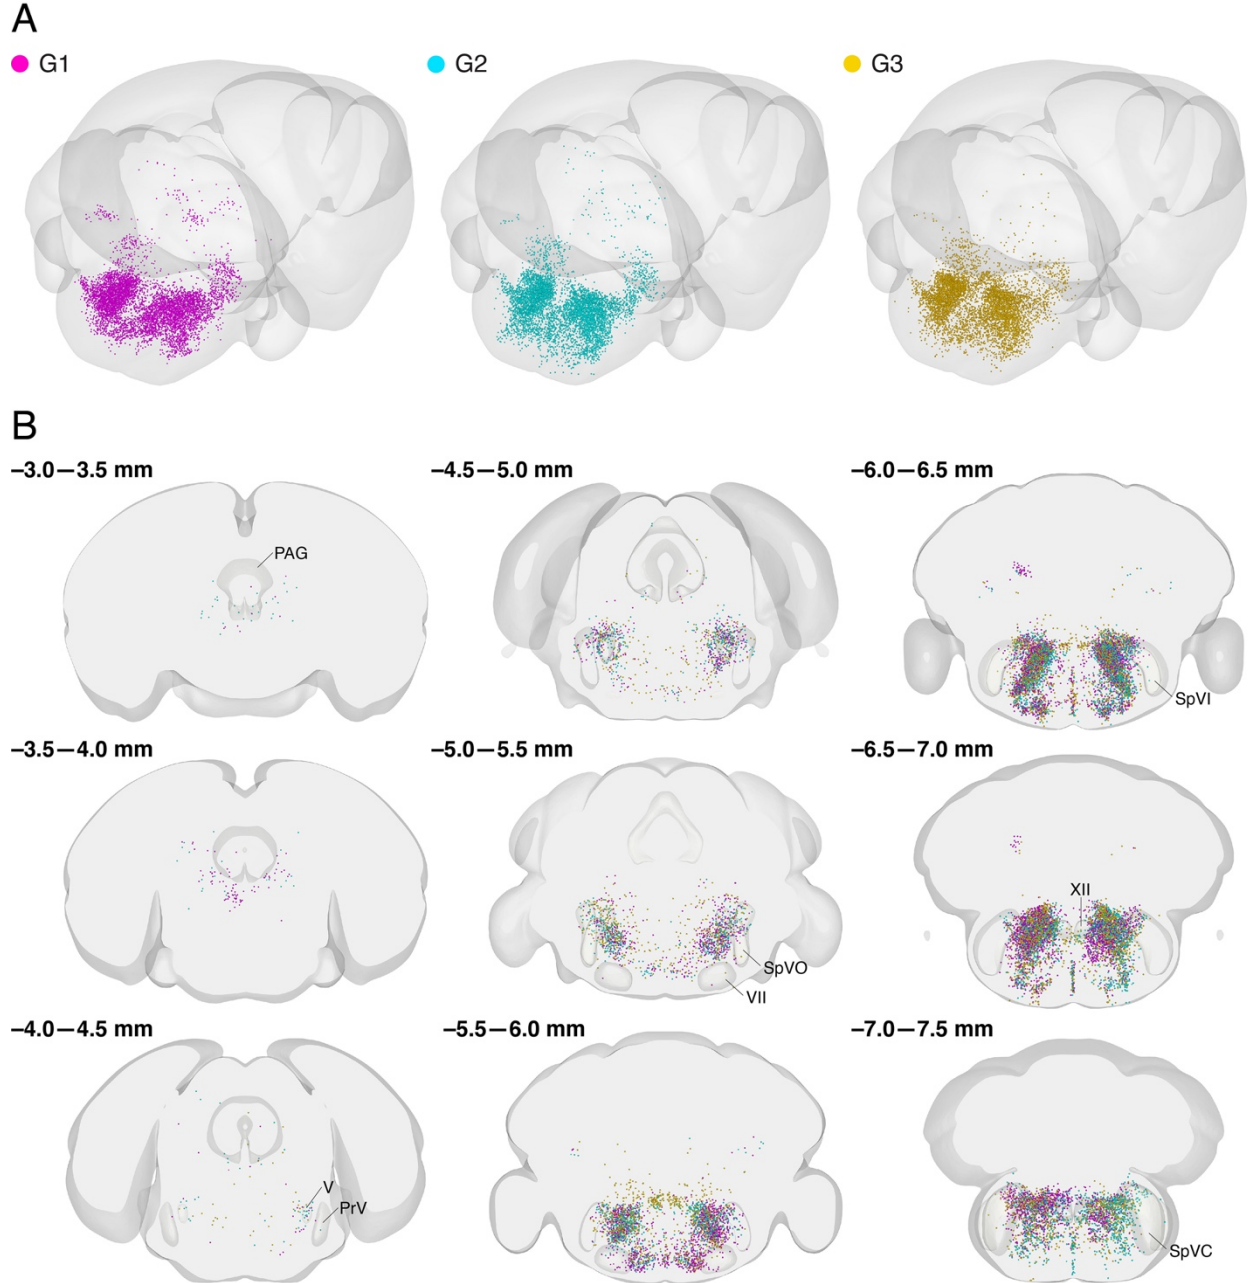

1063

1064

1065 **Figure supplement 4. Distribution of labeled genioglossus premotor neurons from**  
1066 **individual animals in Allen CCF.**

1067 (A) 3D reconstruction of labeled genioglossus premotor neurons with the posterior oblique view

1068 from 3 different mice (G1 magenta, G2 cyan, G3 gold). (B) Coronal views of reconstructed

1069 genioglossus premotor neurons from all three mice in the same coordinates. Anterior-posterior  
1070 levels (referenced to Bregma) are shown on the top left of each panel.

## Masseter premotor neurons

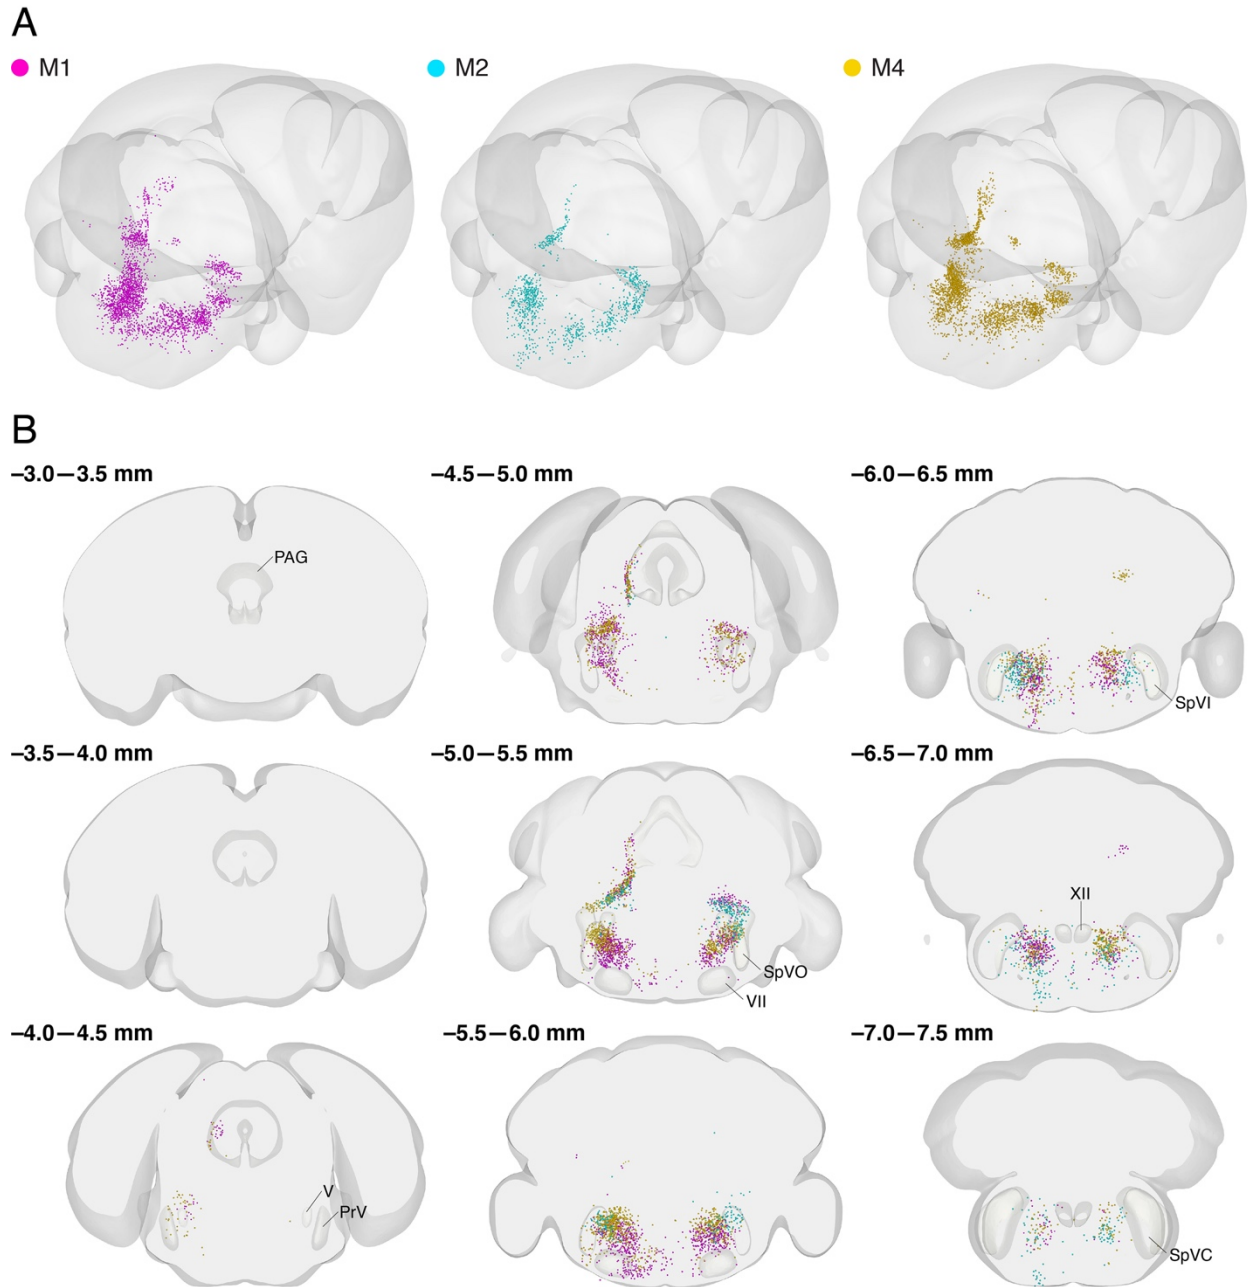

1071

1072

1073 **Figure supplement 5. Distribution of labeled masseter premotor neurons from individual**  
1074 **animals in Allen CCF.**

1075 (A) 3D reconstruction of labeled masseter premotor neuron with the posterior oblique view from

1076 3 different mice (M1 magenta, M2 cyan, M3 gold). (B) Coronal views of reconstructed masseter



- 1077 premotor neurons from all three mice in the same coordinates. Anterior-posterior levels  
1078 (referenced to Bregma) are shown on the top left of each panel.

## Whisker, Genioglossus and Masseter premotor neurons

● W3 ● M4 ● G3

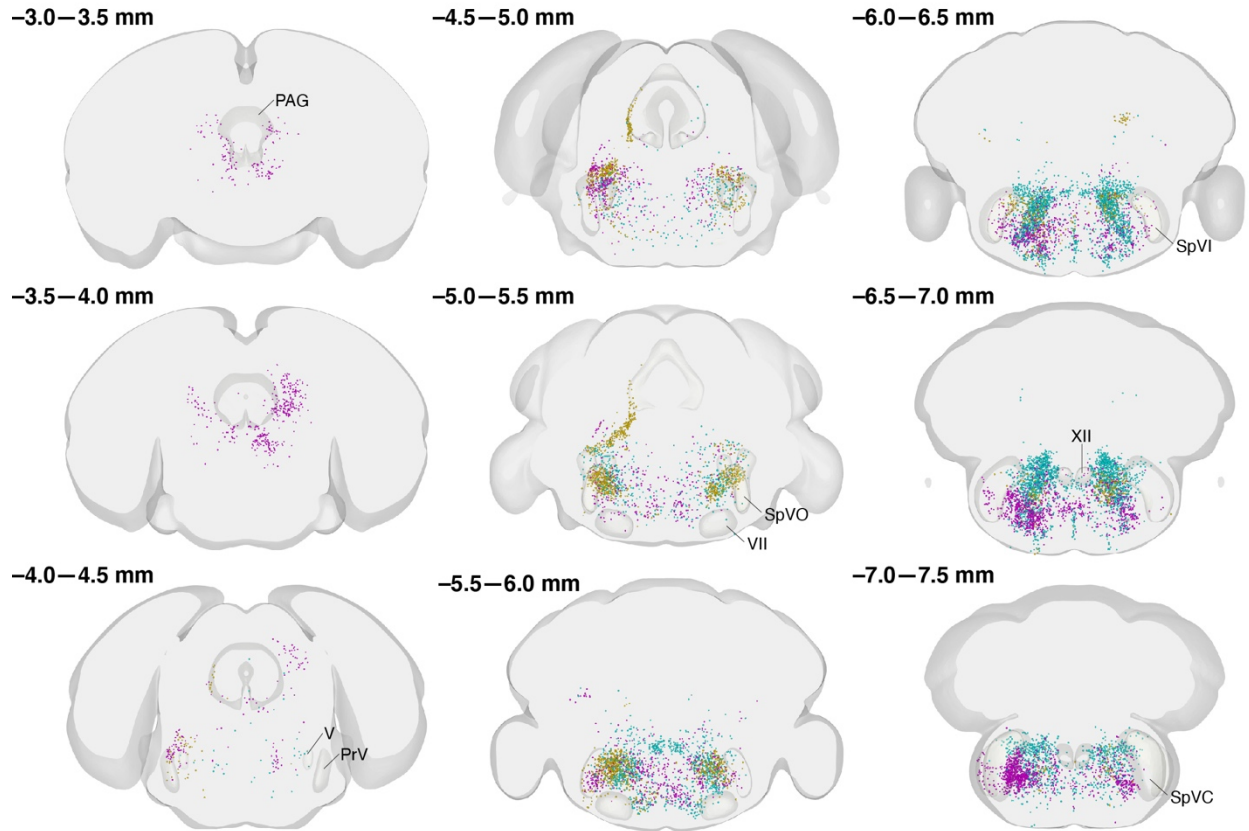

1079

1080

1081 **Figure supplement 6. Whisker-, genioglossus-, and masseter- premotor neurons in the same**  
1082 **Allen CCF.**

1083 Coronal views of reconstructed whisker (magenta), genioglossus (cyan), and masseter (gold)

1084 premotor neurons. Anterior-posterior levels (referenced to Bregma) are shown on the top left of

1085 each panel. The identification numbers of animals are shown on top.

## Top 10 labeled premotor nuclei

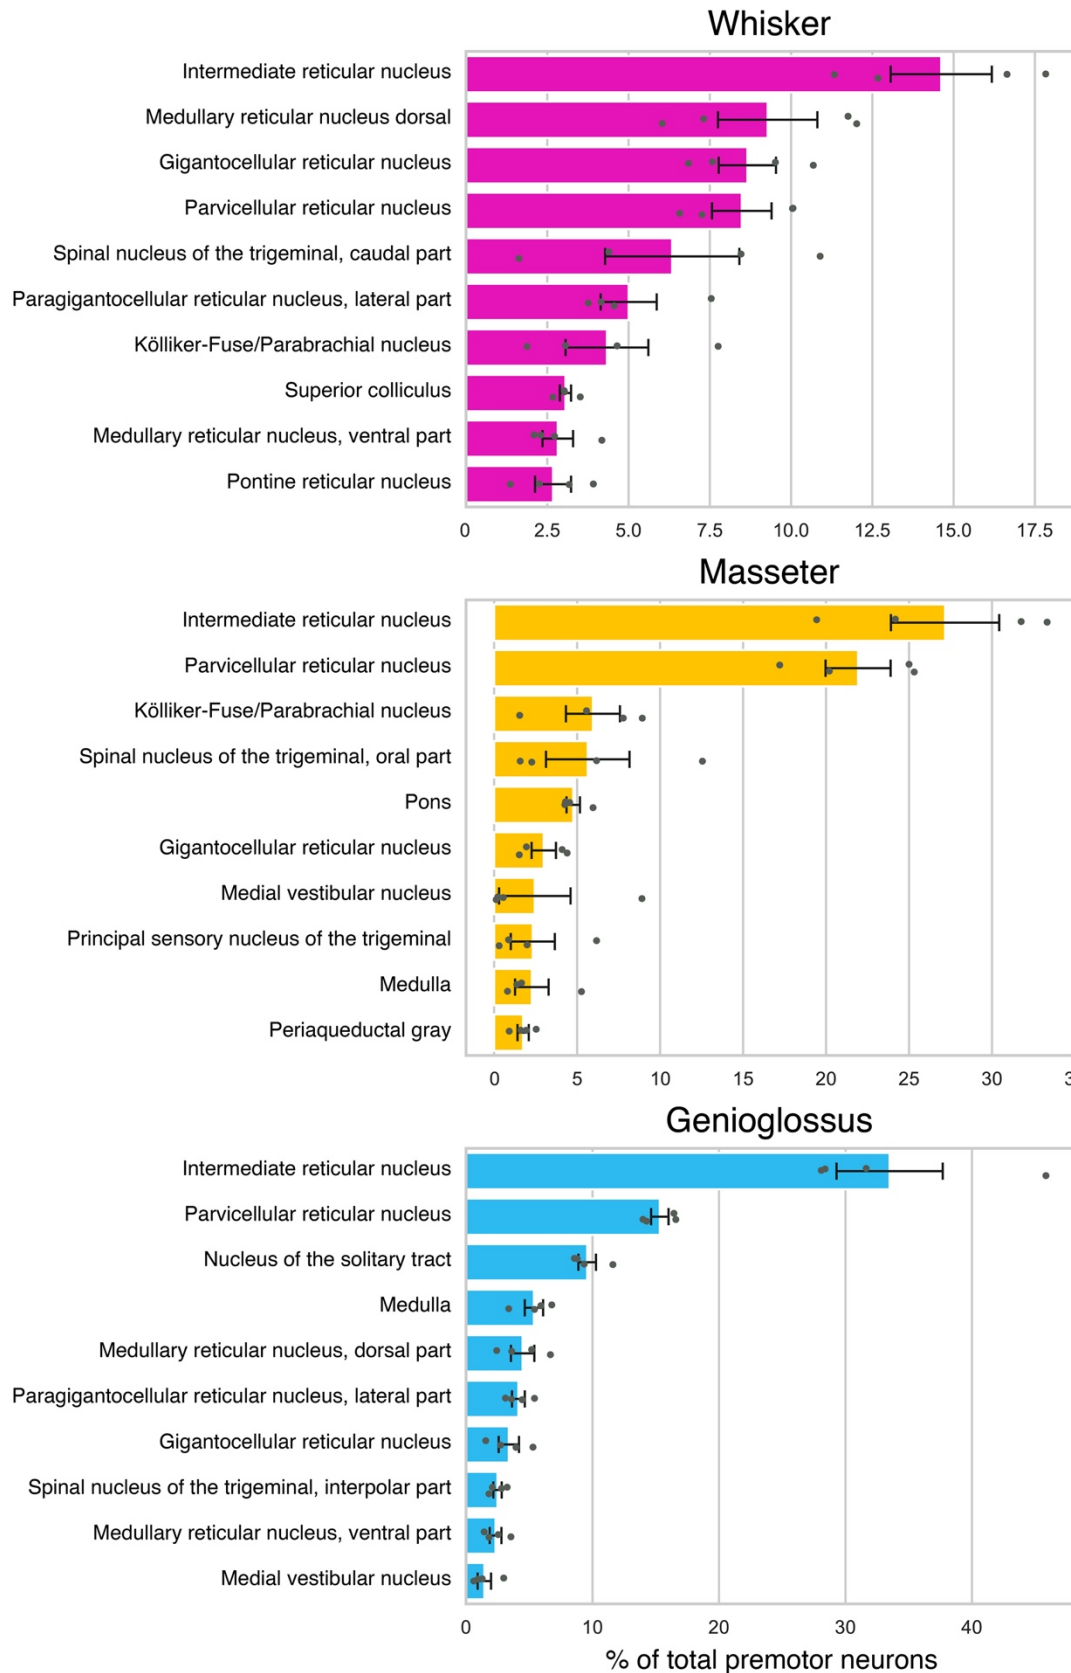

1087 **Figure supplement 7. Quantification of trans-synaptically labeled neurons in top 10 labeled**  
1088 **brain areas for each motor group based on Allen CCF nomenclature.**

1089 Summary of the distributions of whisker (Top, magenta, n = 4), masseter (middle, gold, n = 4),  
1090 and genioglossus (bottom, cyan, n = 4) premotor neurons. Brain areas were automatically  
1091 annotated based on Allen CCF coordinates. The value is normalized against the total numbers of  
1092 labeled neurons and averaged across animals. Data are mean  $\pm$  SEM (n = 4).

## Bilateral VII common premotor neurons

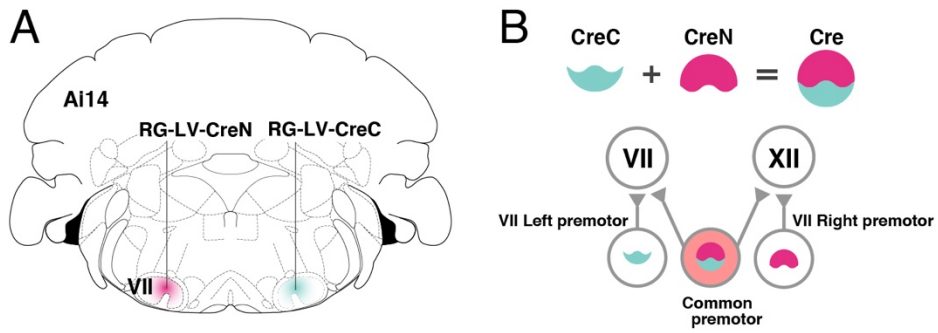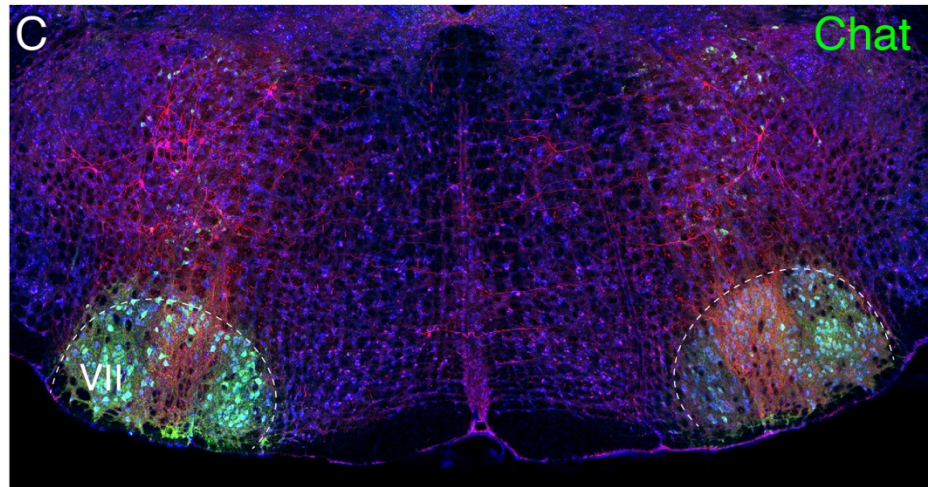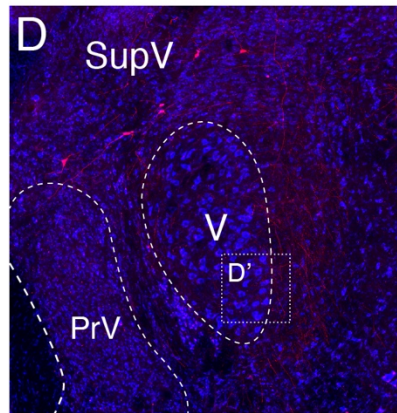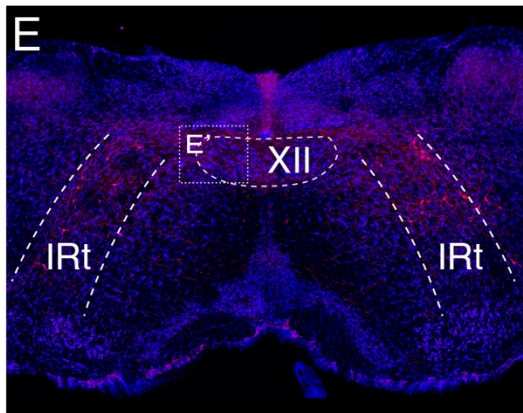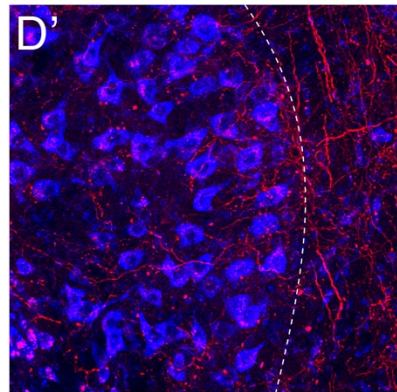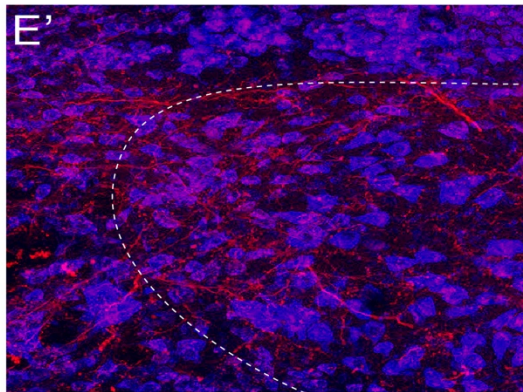



1094 **Figure supplement 8. Identifying common premotor neurons with bilateral collateral**  
1095 **projections to VII<sub>middle</sub>.**

1096 **(A, B)** Schematic of split-Cre tracing strategy. **(B)** RG-LV-CreN and RG-LV-CreC were injected  
1097 into the left and right VII<sub>middle</sub> of Ai 14 mice, respectively. Cre is reconstituted only in neurons  
1098 innervating both left and right VII<sub>middle</sub>, which induces tdTomato reporter expression. **(C)**  
1099 Representative images of axons/axon collaterals in the injection sites. Note the dense tdTomato  
1100 signal in VII<sub>middle</sub>, and bilateral VII<sub>middle</sub> common premotor neurons in th IRt dorsal to VII.  
1101 Motoneurons were stained with anti-chat antibody (green). **(D-E')** bilateral VII<sub>middle</sub> common  
1102 premotor neurons are observed in SupV (D) and the dorsal IRt (E). Axon collaterals of bilateral  
1103 VII<sub>middle</sub> premotor neurons also innervate V (**D'**; the boxed area in D) and XII (**E'**; the boxed area  
1104 in E) motor neurons. Sections were counterstained with fluorescent Nissl (blue).

1105 Supplemental Movie 1. Interactive Movie: 3D reconstructed whisker, genioglossus, and masseter  
1106 premotor neurons.  
1107 Whisker (w3, magenta), genioglossus (g3, cyan), and masseter (m4, gold) premotor neurons  
1108 were reconstructed in the same Allen CCF. The file can be opened in a Web browser. The 3D  
1109 reconstructed brain can be rotated by clicking and dragging it. Zoom can be controlled with the  
1110 mouse wheel.
